# Supplementary material for: Effects of Grape Seed Extract and Proanthocyanidin B2 on In Vitro Proliferation, Viability, Steroidogenesis, Oxidative Stress, and Cell Signaling in Human Granulosa Cells
Source: Int J Mol Sci. 2019 Aug 28;20(17):4215. doi: 10.3390/ijms20174215 (PMC6747392; doi:10.3390/ijms20174215)
Supplement: Supplementary file 1 [file ijms-20-04215-s001.pdf]

# Cyclin D2 (33 kDa) KGN cells

Marker of Molecular weight (Sigma Aldrich ref SDS7B2)

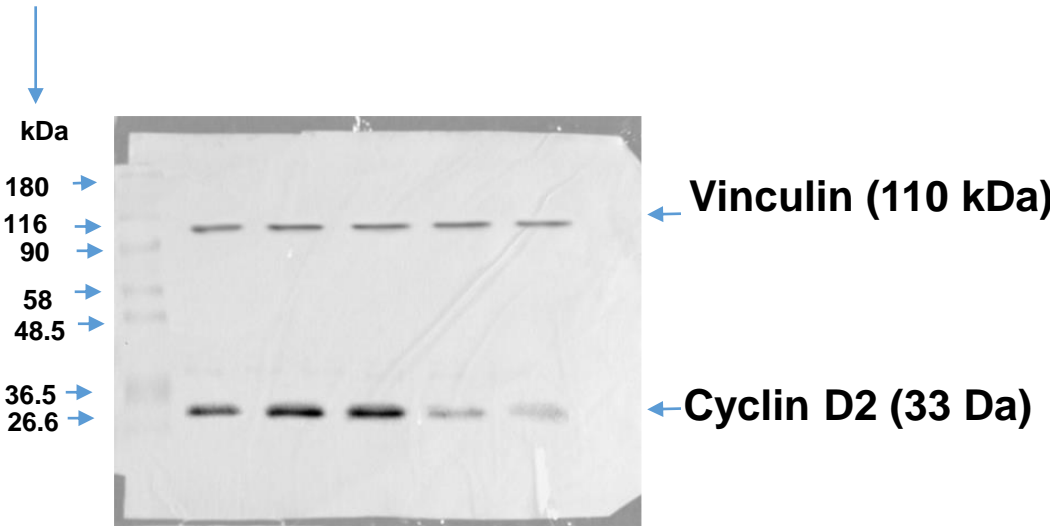

Marker of Molecular weight  
(Precision Plus Protein™ Dual Color Standards, #1610374 BioRad)

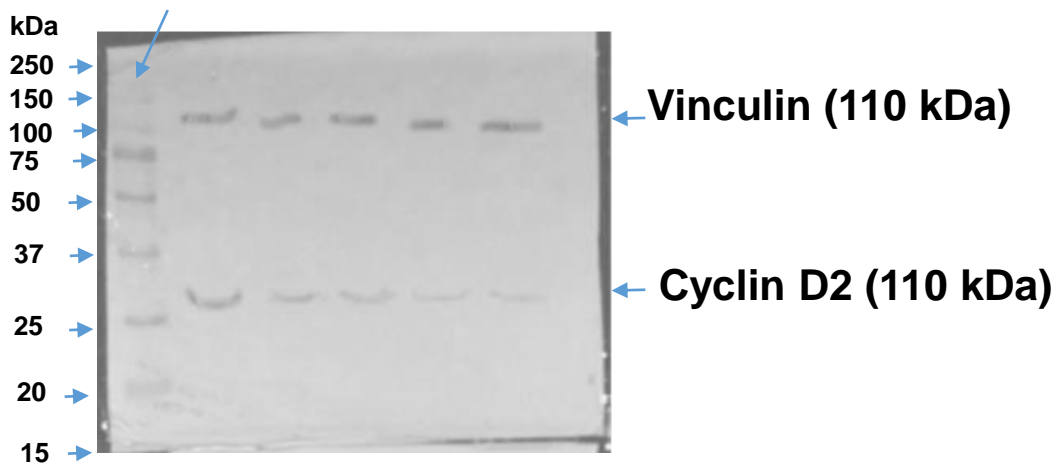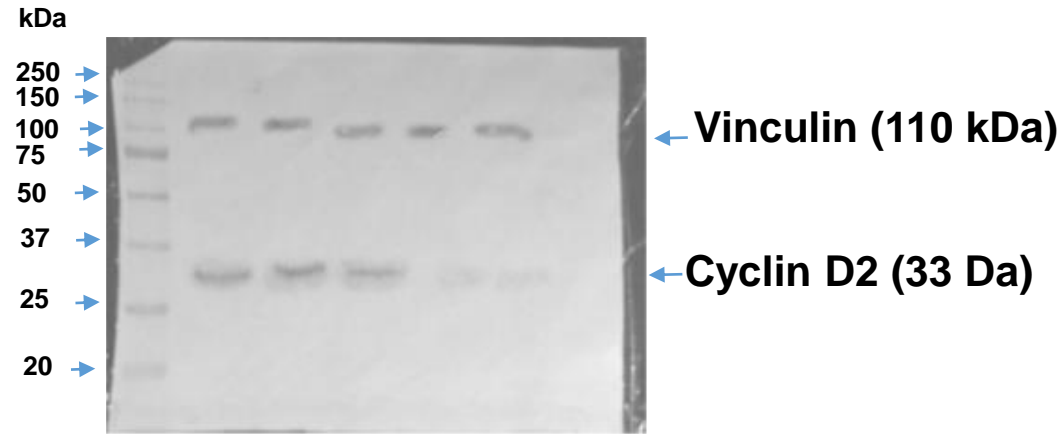

**Revelation of the blots performed with the** a G-box SynGene (Ozyme, St Quentin en Yvelines, France) and GeneSnap software : a composite with the membrane with the markers and the membrane revealed with ECL after the antibodies incubation is shown. Membranes were probed with cyclin D2 and Vinculin antibodies.

**Supplemental figure 1**

# Cyclin D2 (33 kDa) hGC cells

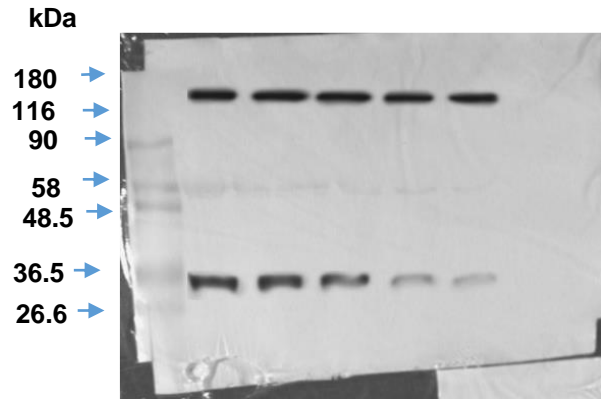

Vinculin (110 kDa)

Cyclin D2 (33 kDa)

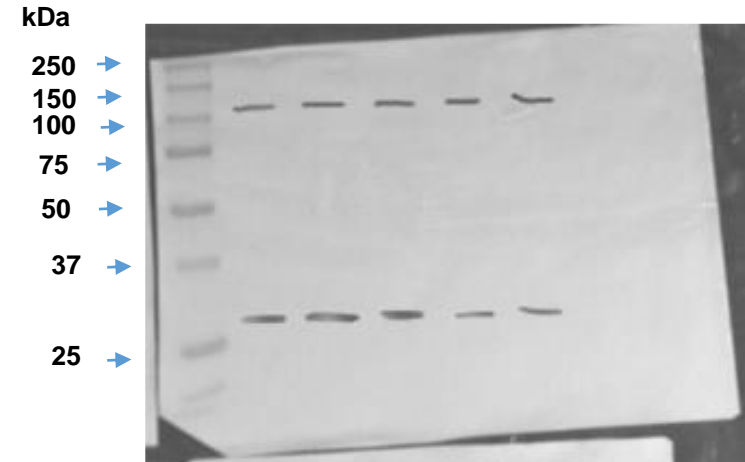

Vinculin (110 kDa)

Cyclin D2 (33 kDa)

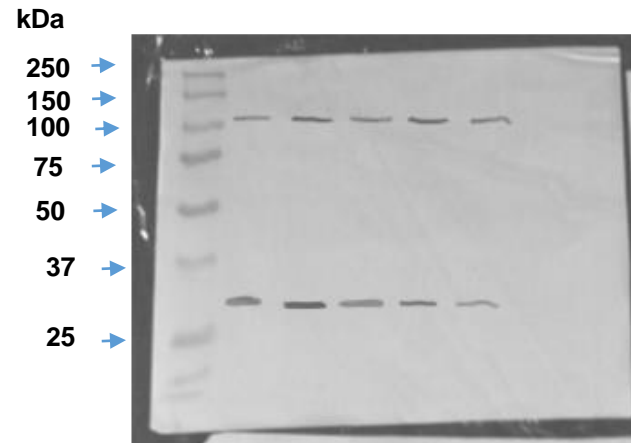

Vinculin (110 kDa)

Cyclin D2 (33 kDa)

**Revelation of the blots performed with the** a G-box SynGene (Ozyme, St Quentin en Yvelines, France) and GeneSnap software : a composite with the membrane with the markers and the membrane revealed with ECL after the antibodies incubation is shown. Membranes were probed with cyclin D2 and Vinculin antibodies.

## Supplemental figure 2

# P21 (21 kDa) KGN cells

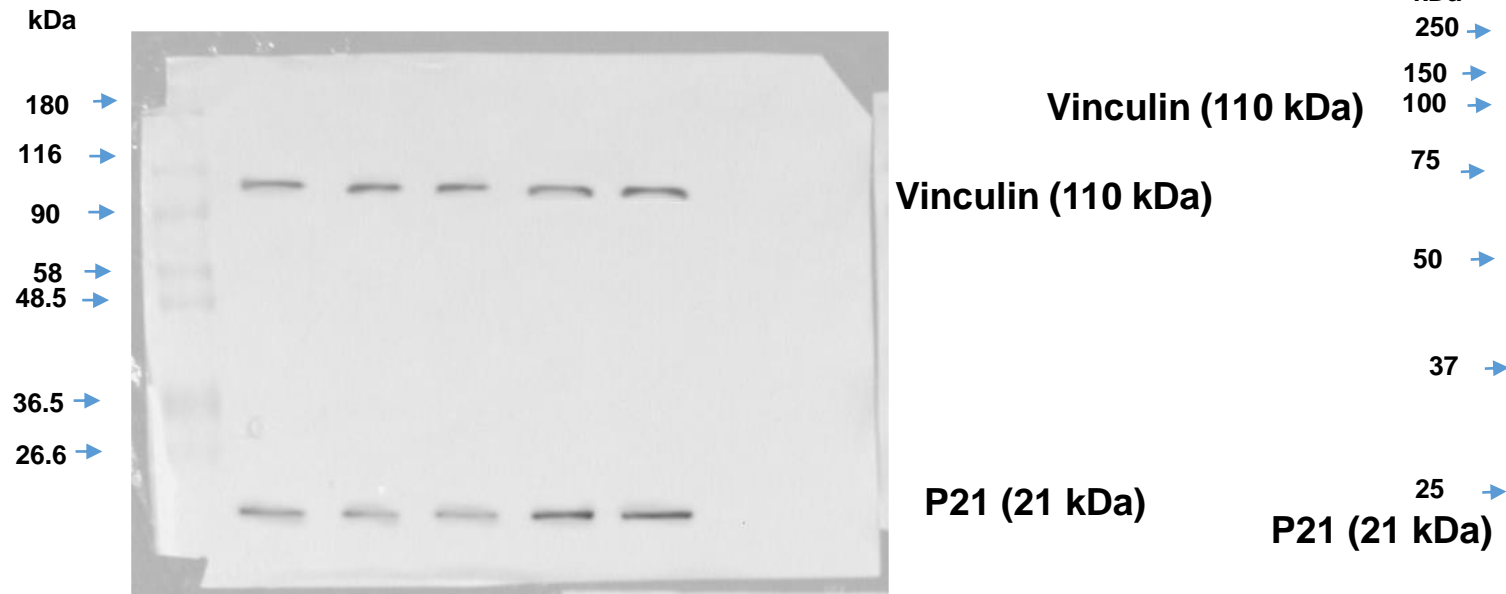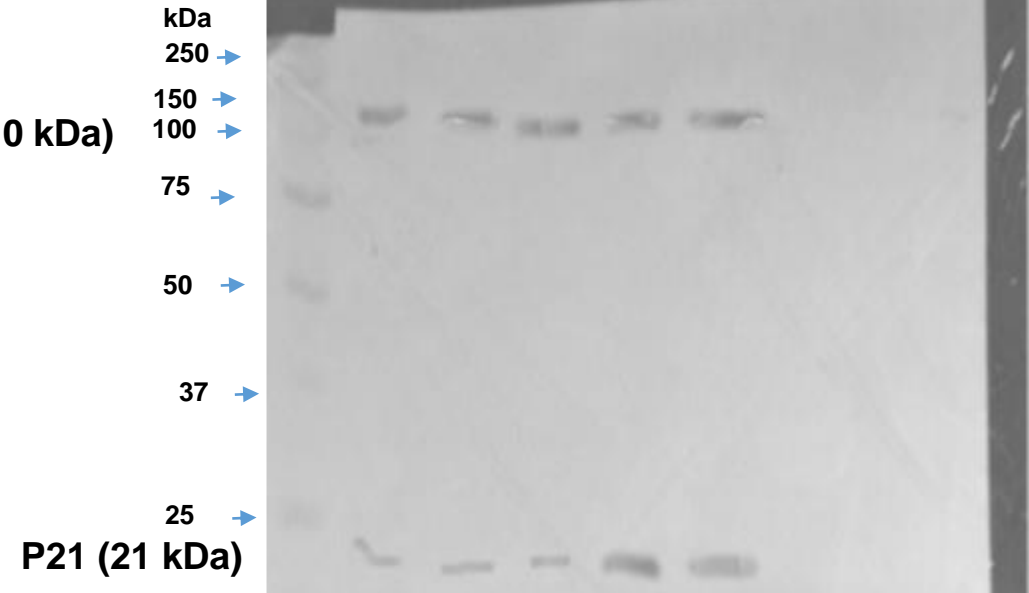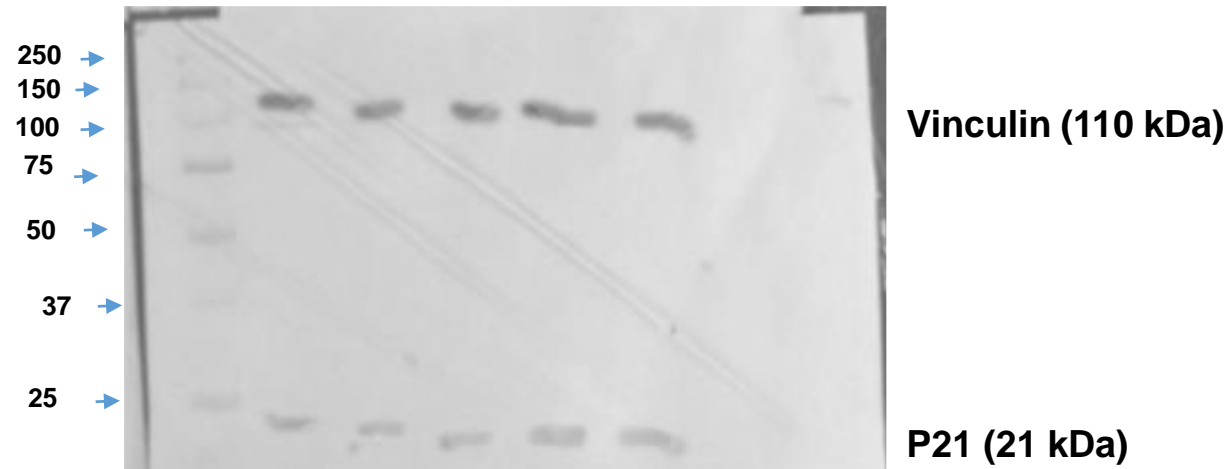

**Revelation of the blots performed with the** a G-box SynGene (Ozyme, St Quentin en Yvelines, France) and GeneSnap software : a composite with the membrane with the markers and the membrane revealed with ECL after the antibodies incubation is shown. Membranes were probed with p21 and Vinculin antibodies.

## Supplemental figure 3

# P21 (21 kDa) hGC cells

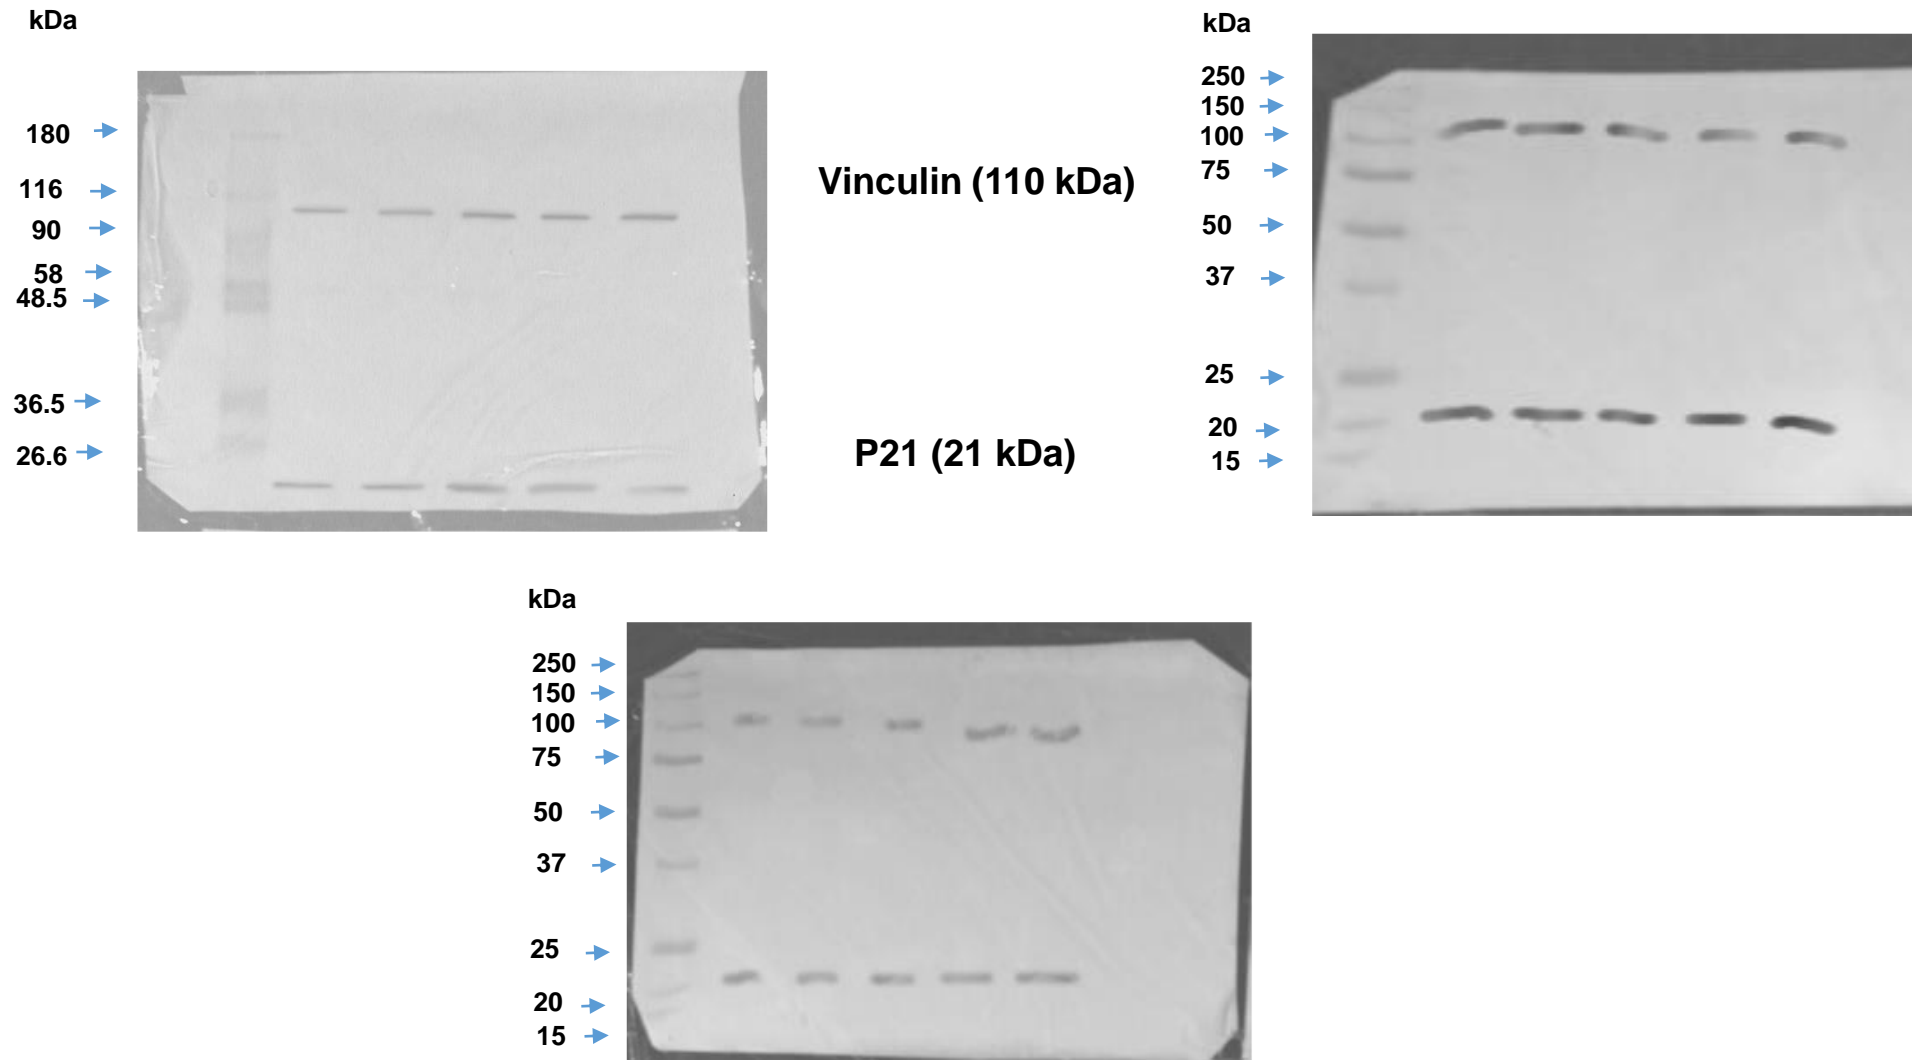

**Revelation of the blots performed with the** a G-box SynGene (Ozyme, St Quentin en Yvelines, France) and GeneSnap software : a composite with the membrane with the markers and the membrane revealed with ECL after the antibodies incubation is shown. Membranes were probed with p21 and Vinculin antibodies.

**Supplemental figure 4**

# P27 (27 kDa) KGN cells

kDa  
180 →  
116 →  
90 →  
58 →  
48.5 →  
36.5 →  
26.6 →

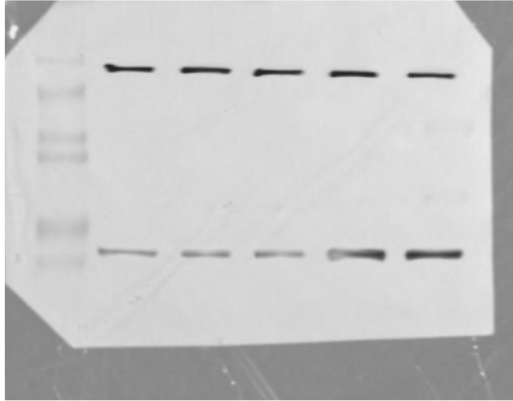

Vinculin (110 kDa)

P27 (27 kDa)

kDa  
250 →  
150 →  
100 →  
75 →  
50 →  
37 →  
25 →  
20 →

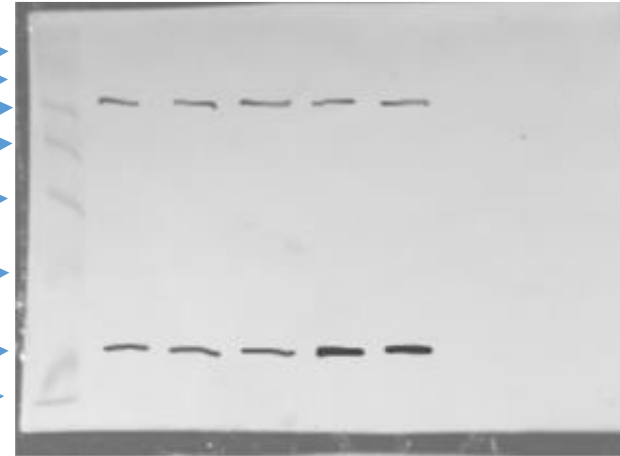

Vinculin (110 kDa)

P27 (27 kDa)

kDa  
250 →  
150 →  
100 →  
75 →  
50 →  
37 →  
25 →  
20 →

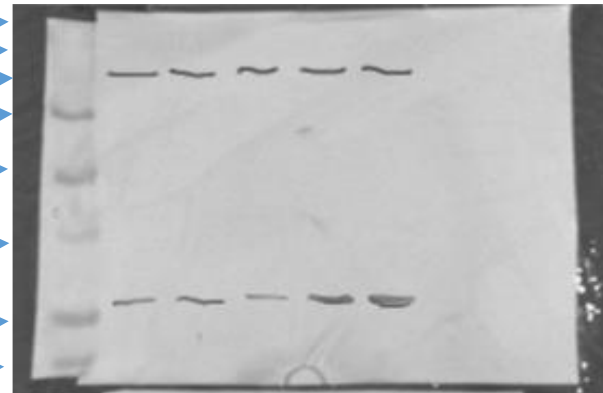

Vinculin (110 kDa)

P27 (27 kDa)

**Revelation of the blots performed with the** a G-box SynGene (Ozyme, St Quentin en Yvelines, France) and GeneSnap software : a composite with the membrane with the markers and the membrane revealed with ECL after the antibodies incubation is shown. Membranes were probed with p27 and Vinculin antibodies.

**Supplemental figure 5**

# P27 (27 kDa) hGC cells

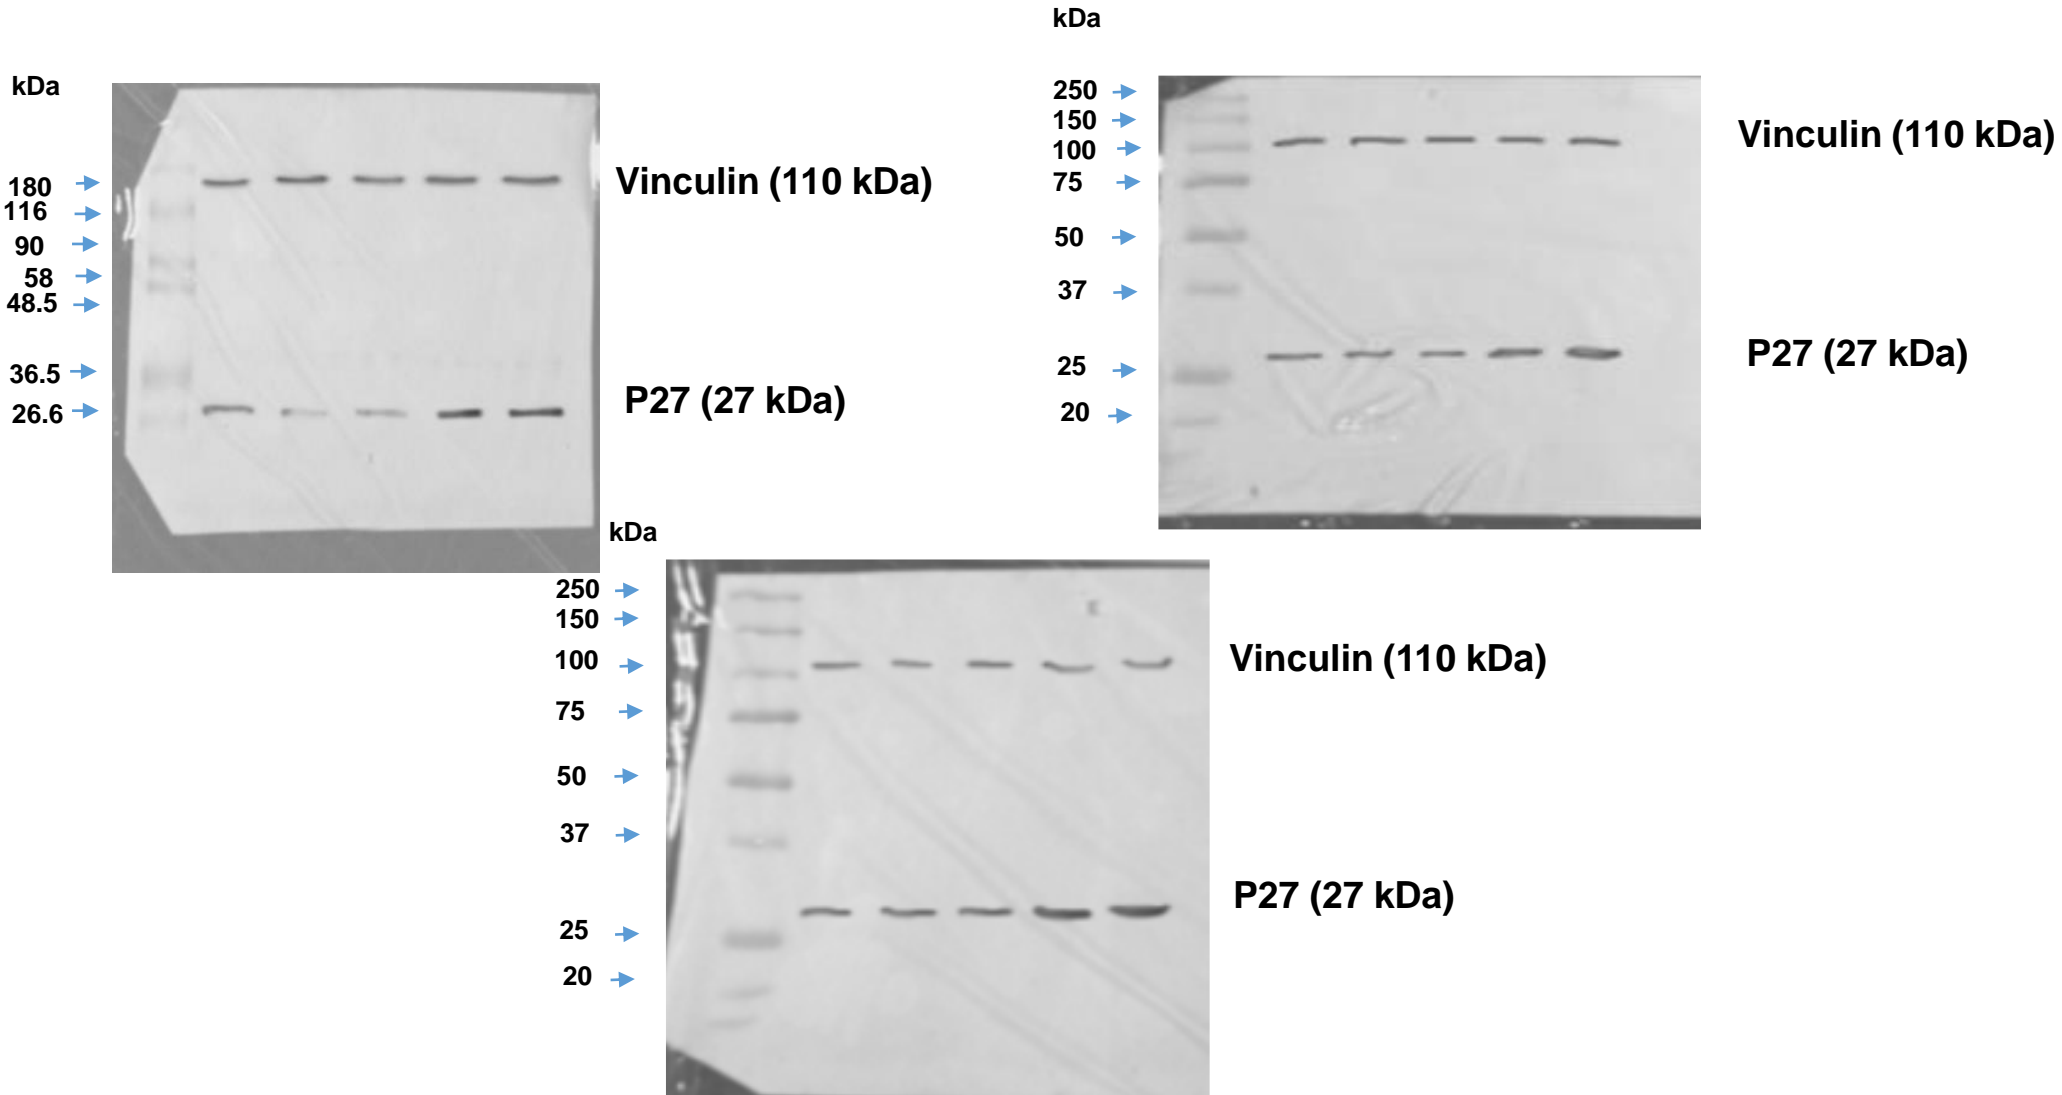

**Gel SDS PAGE 12%, revelation of the blots performed with the a G-box SynGene (Ozyme, St Quentin en Yvelines, France) and GeneSnap software : a composite with the membrane with the markers and the membrane revealed with ECL after the antibodies incubation is shown. Membranes were probed with p27 and Vinculin antibodies.**

**Supplemental figure 6**

# Caspase 3 cleaved (18 kDa) in KGN cells

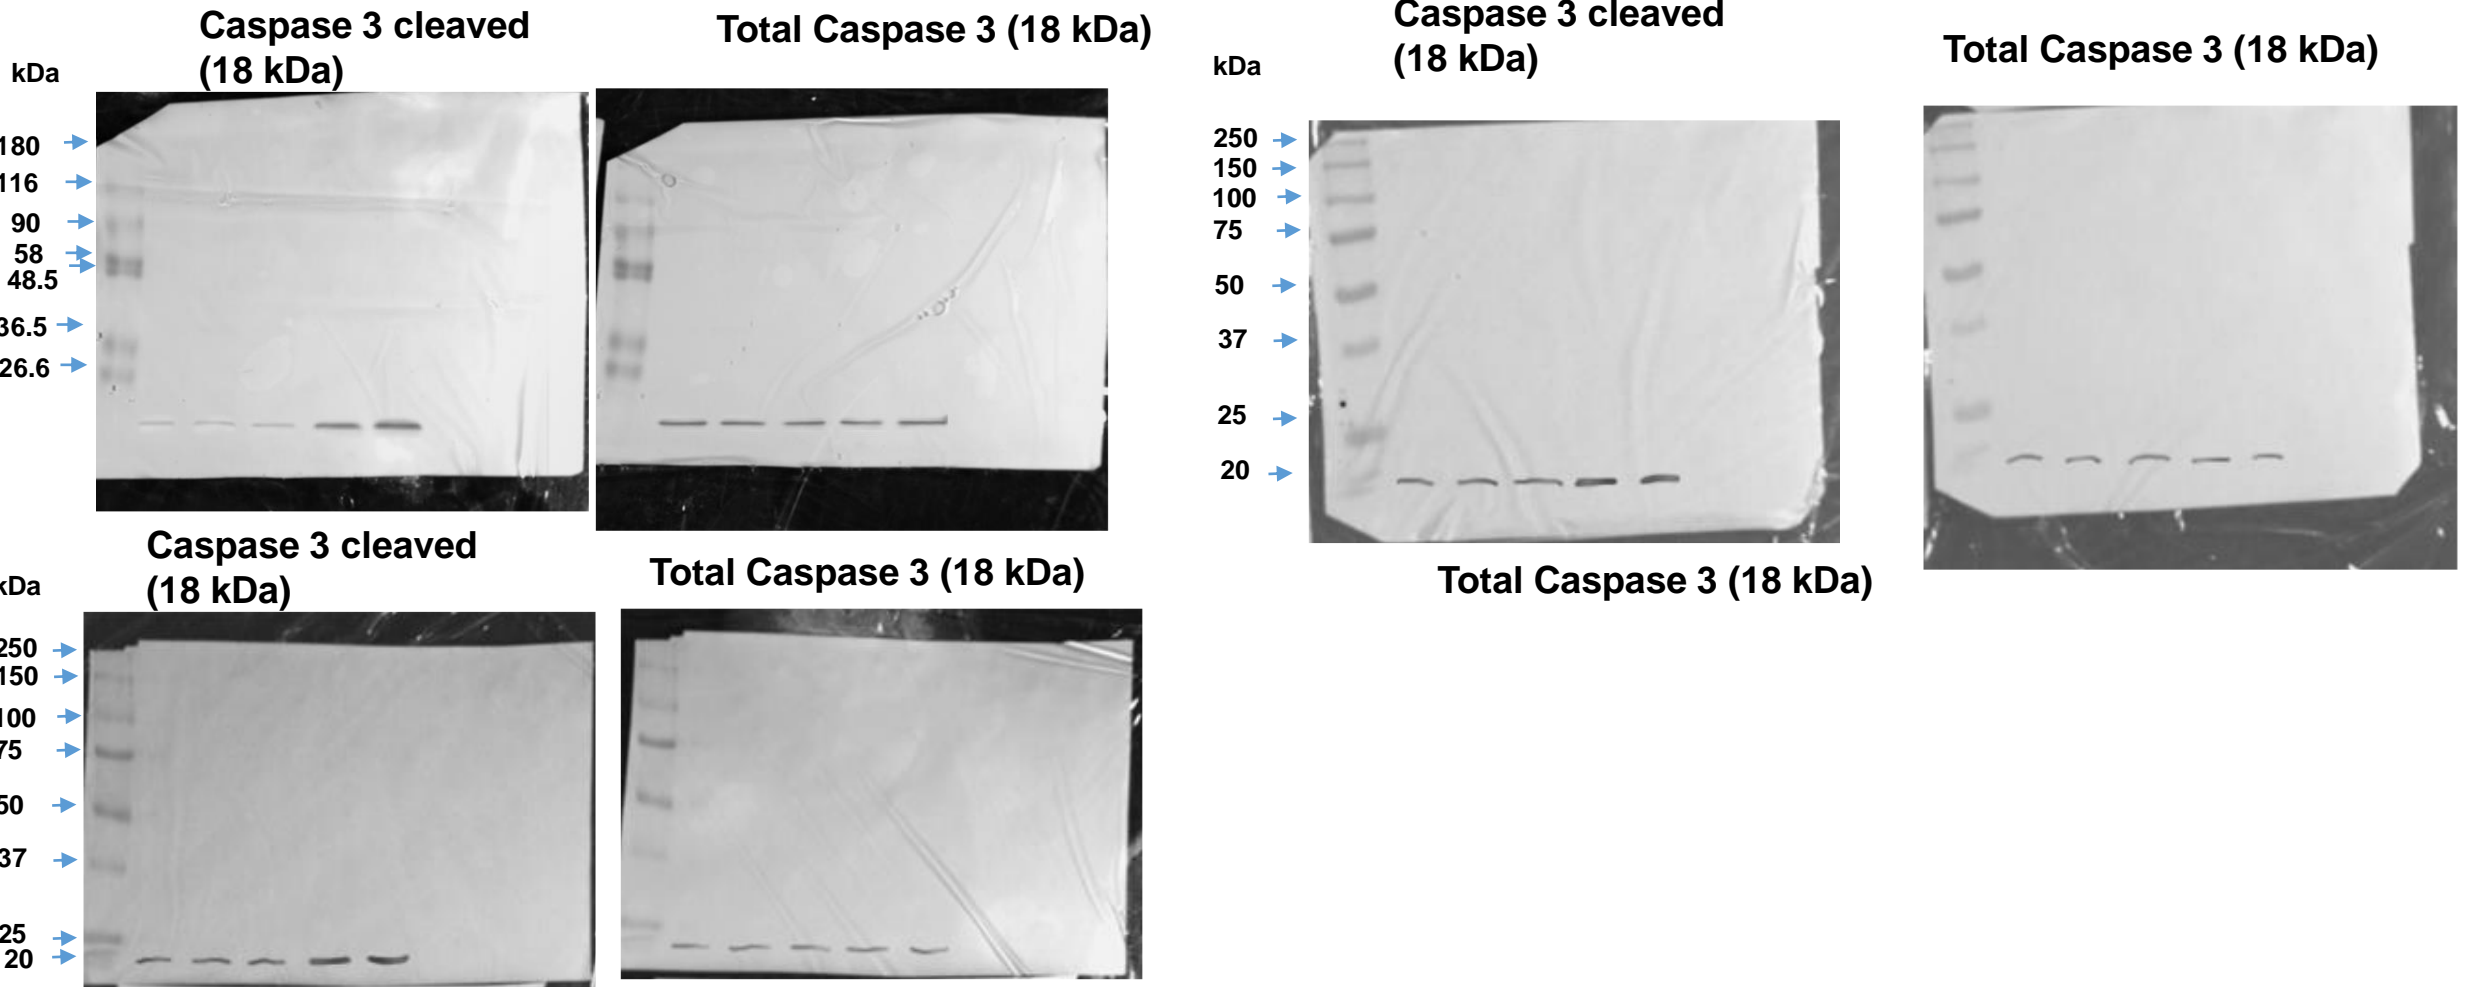

**Gel SDS PAGE 12%, revelation of the blots performed with the a G-box SynGene (Ozyme, St Quentin en Yvelines, France) and GeneSnap software :** a composite with the membrane with the markers and the membrane revealed with ECL after the antibodies incubation is shown. Membranes were probed with caspase 3 cleaved antibodies and then after stripping they were probed with total caspase 3 antibodies.

**Supplemental figure 7**

# Caspase 3 cleaved (18 kDa) in hGC cells

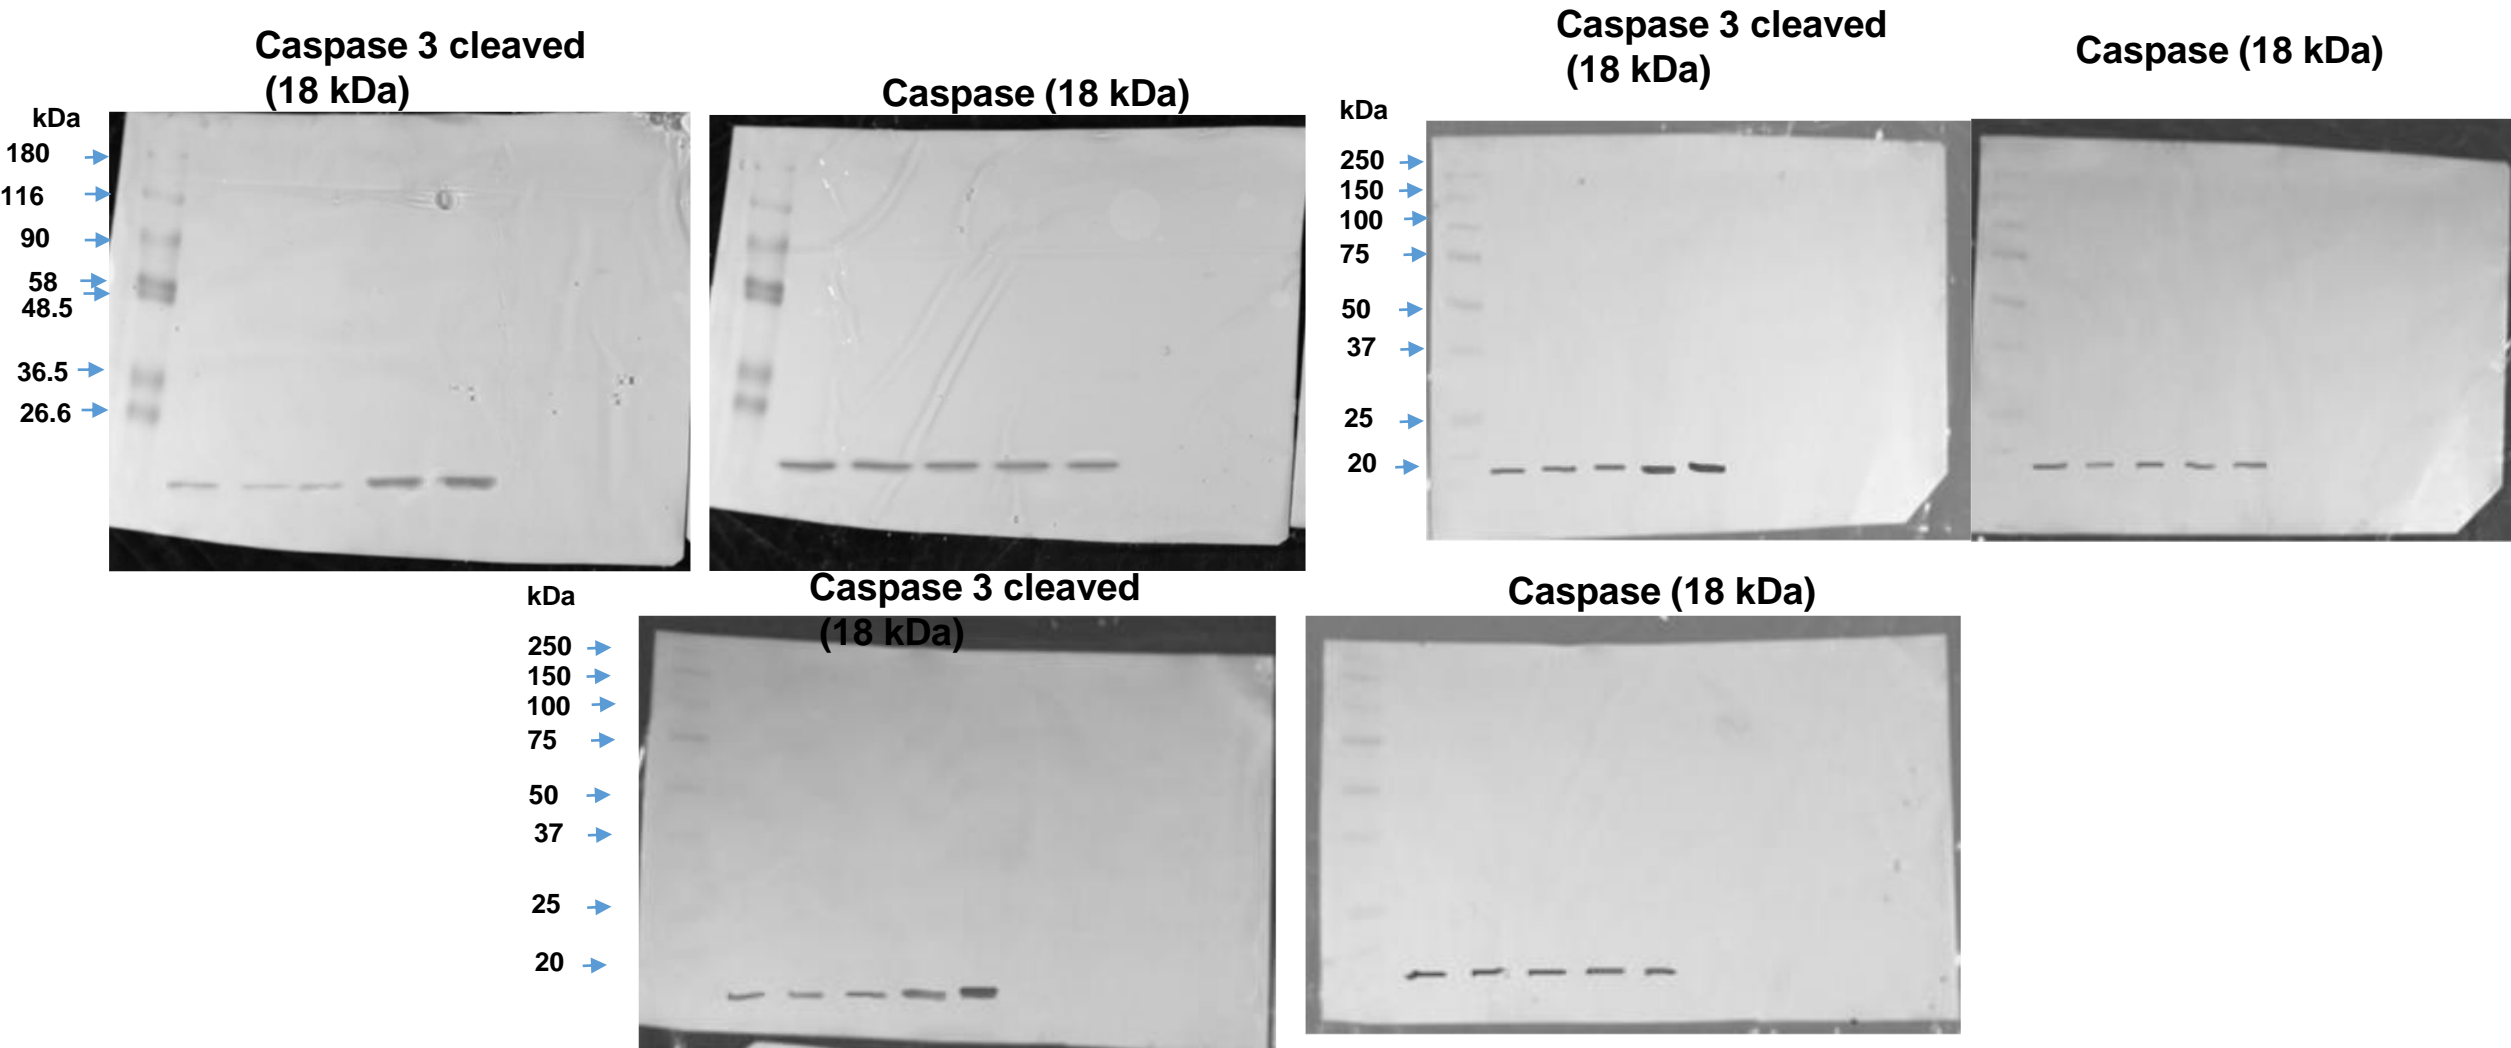

**Revelation of the blots performed with the** a G-box SynGene (Ozyme, St Quentin en Yvelines, France) and GeneSnap software : a composite with the membrane with the markers and the membrane revealed with ECL after the antibodies incubation is shown. Membranes were probed with caspase 3 cleaved antibodies and then after stripping they were probed with with total caspase 3 antibodies.

**Supplemental figure 8**

# Phospho-Bad (23 kDa) in KGN cells

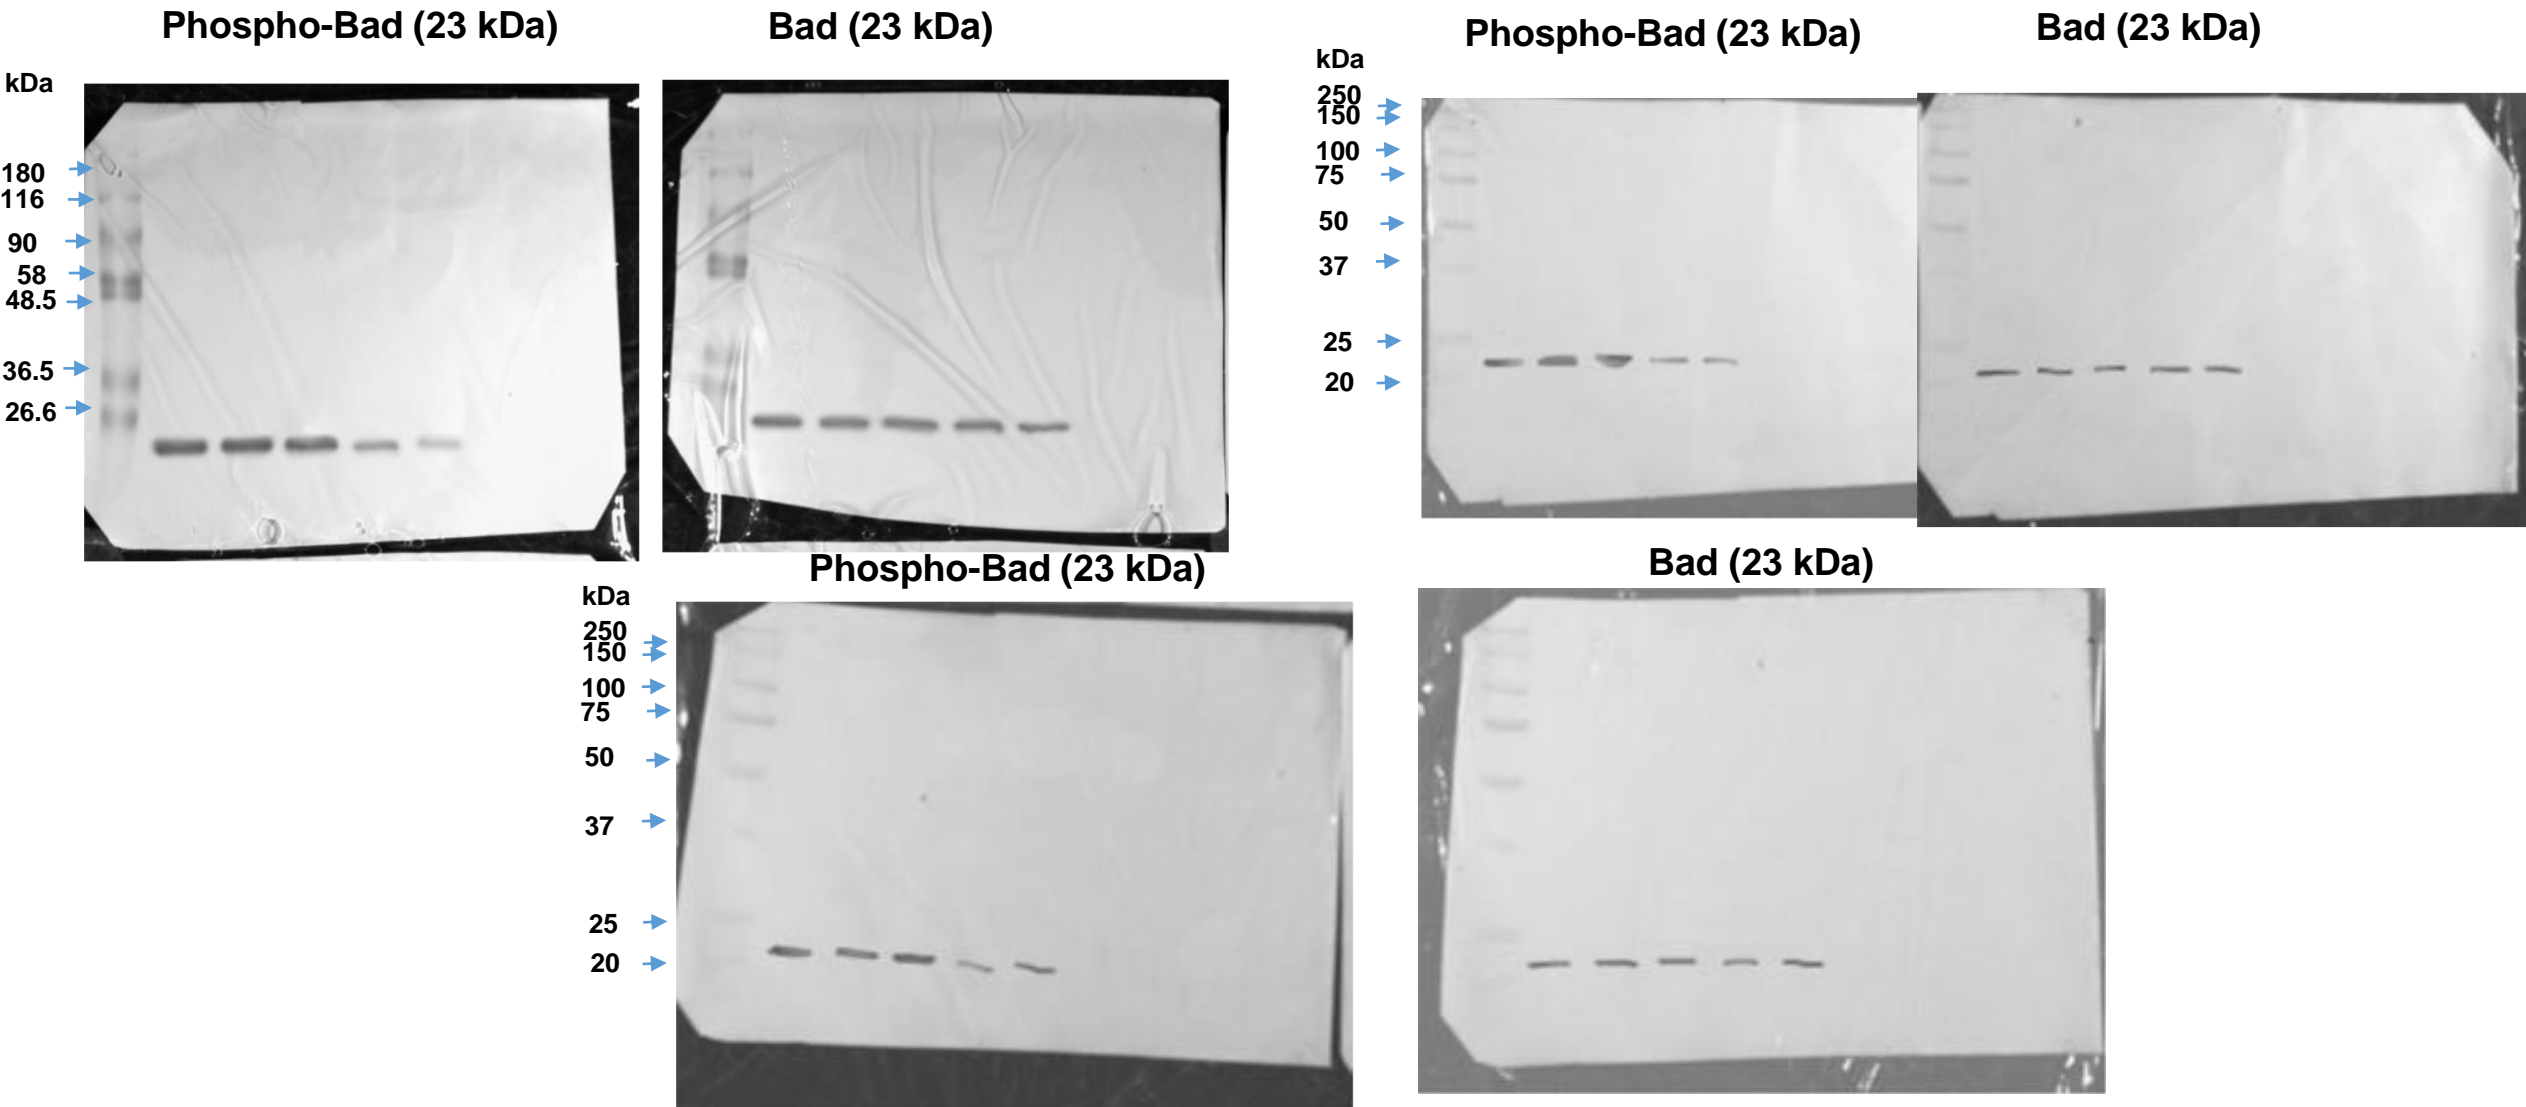

**Revelation of the blots performed with the** a G-box SynGene (Ozyme, St Quentin en Yvelines, France) and GeneSnap software : a composite with the membrane with the markers and the membrane revealed with ECL after the antibodies incubation is shown. Membranes were probed with phospho-Bad antibodies and then after stripping they were probed with total Bad antibodies.

**Supplemental figure 9**

# Phospho-Bad (23 kDa) in hGC cells

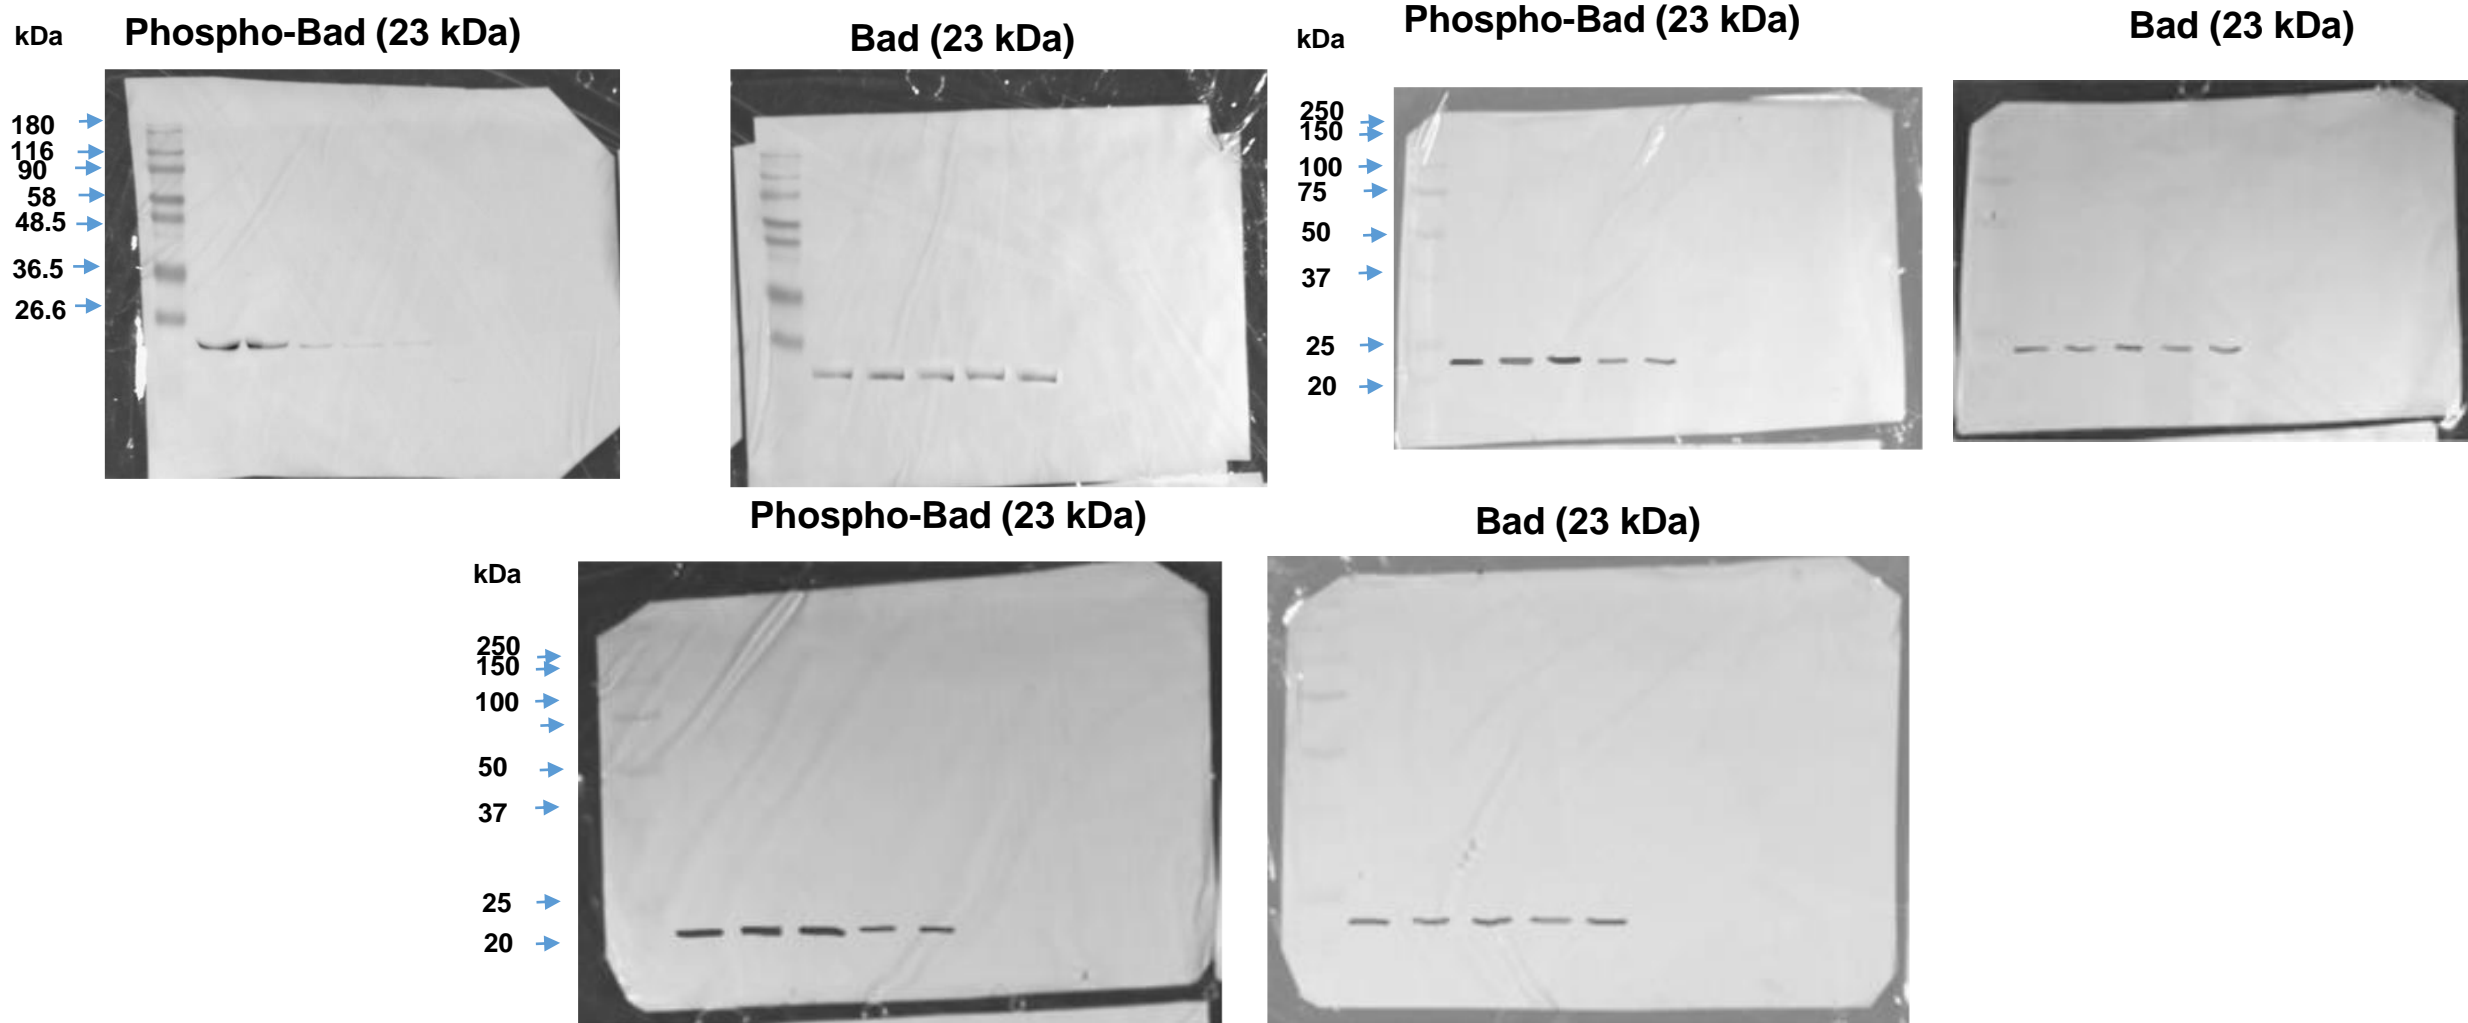

**Revelation of the blots performed with the** a G-box SynGene (Ozyme, St Quentin en Yvelines, France) and GeneSnap software : a composite with the membrane with the markers and the membrane revealed with ECL after the antibodies incubation is shown. Membranes were probed with phospho-Bad antibodies and then after stripping they were probed with total Bad antibodies.

**Supplemental figure 10**

# StAR (32 kDa) in KGN cells

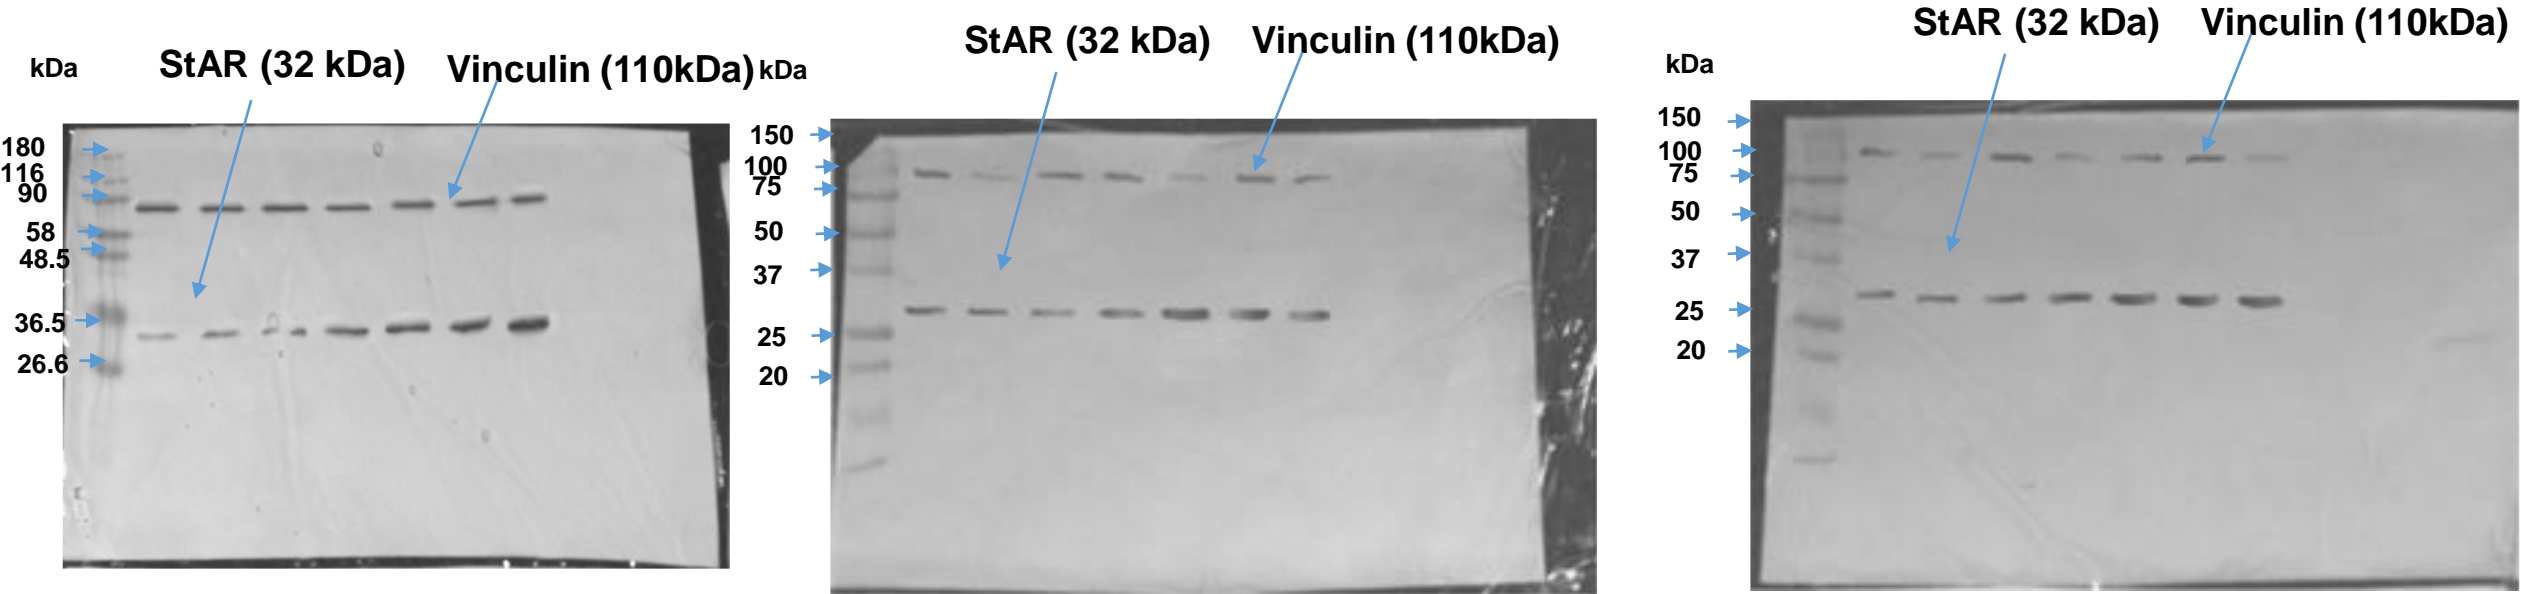

**Revelation of the blots performed with the** a G-box SynGene (Ozyme, St Quentin en Yvelines, France) and GeneSnap software : a composite with the membrane with the markers and the membrane revealed with ECL after the antibodies incubation is shown. Membranes were probed with StAR and Vinculin antibodies.

**Supplemental figure 11**

# StAR (32 kDa) in hGC cells

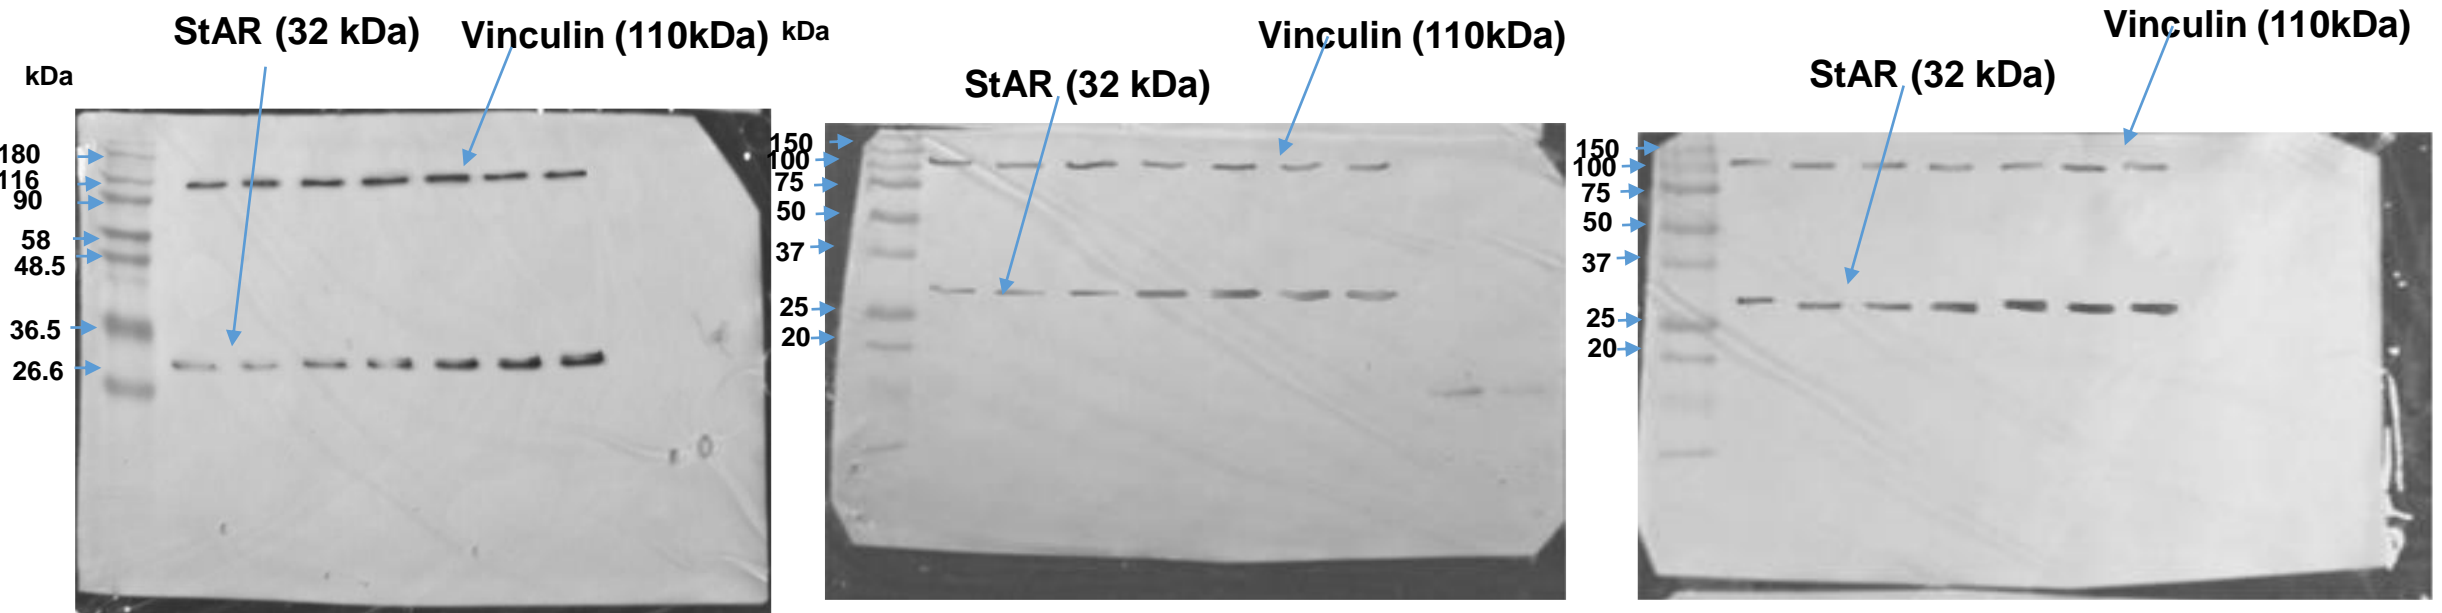

**Revelation of the blots performed with the** a G-box SynGene (Ozyme, St Quentin en Yvelines, France) and GeneSnap software : a composite with the membrane with the markers and the membrane revealed with ECL after the antibodies incubation is shown. Membranes were probed with StAR and Vinculin antibodies.

# Phospho-CREB (43 kDa) in KGN cells

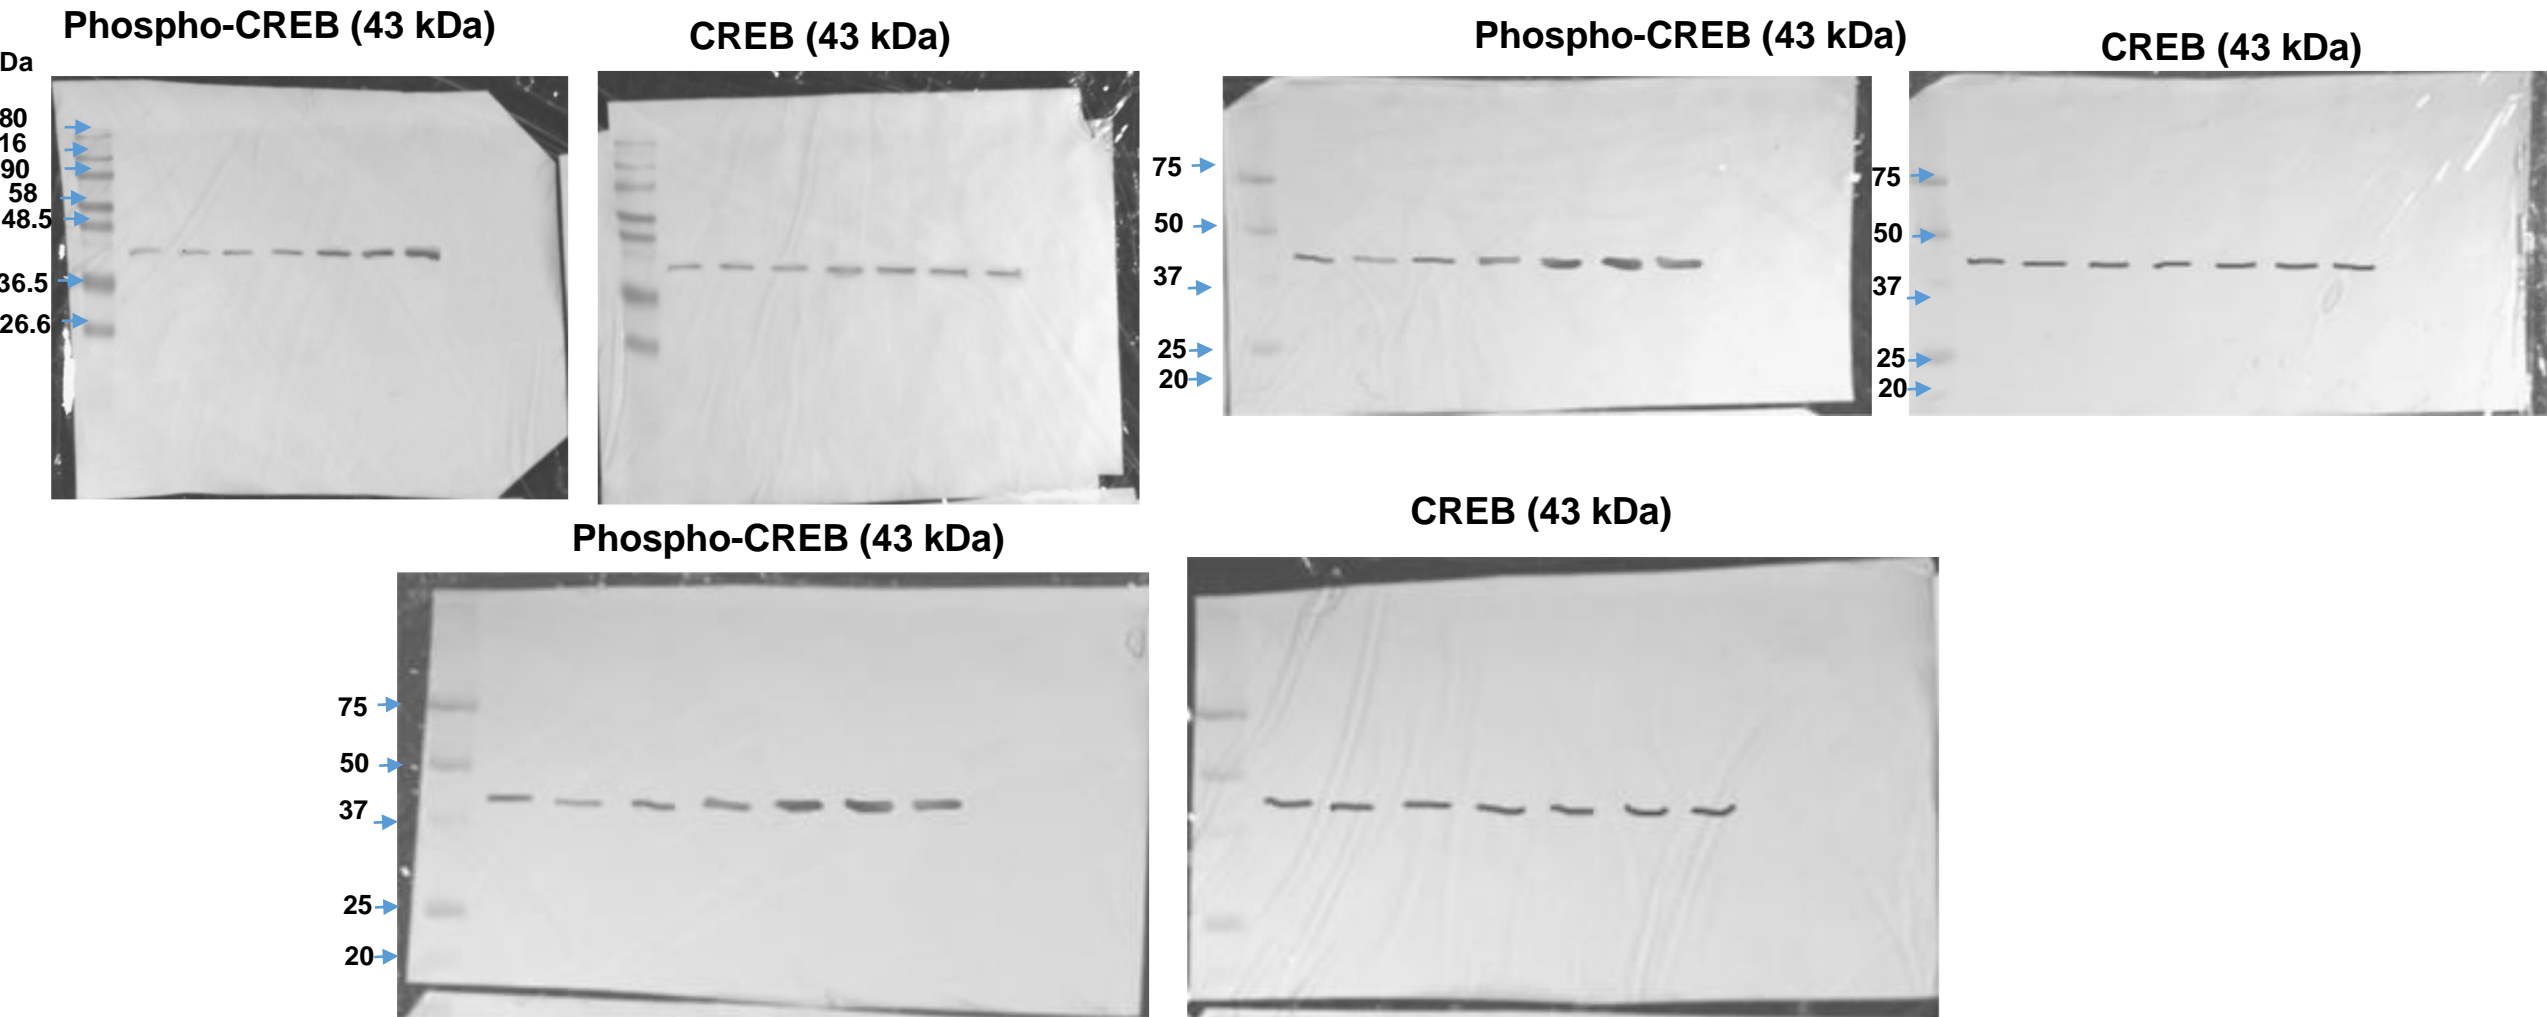

**Revelation of the blots performed with the** a G-box SynGene (Ozyme, St Quentin en Yvelines, France) and GeneSnap software : a composite with the membrane with the markers and the membrane revealed with ECL after the antibodies incubation is shown. Membranes were probed with phospho-Creb antibodies and then after stripping they were probed with with total Creb antibodies.

**Supplemental figure 13**

# Phospho-CREB (43 kDa) in hGC cells

Phospho-CREB (43 kDa)

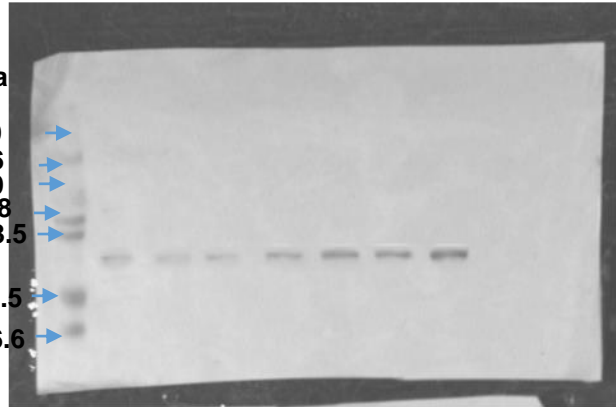

CREB (43 kDa)

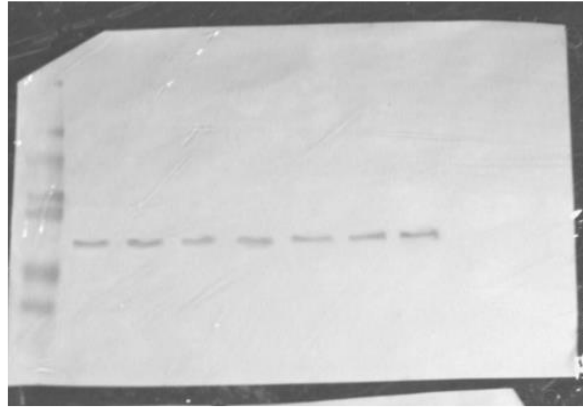

Phospho-CREB (43 kDa)

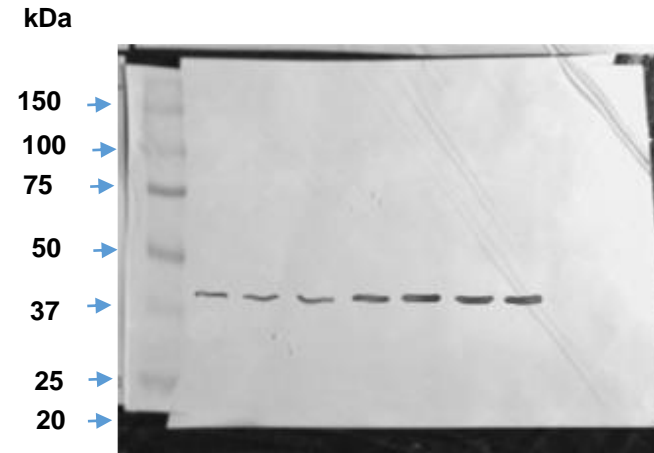

CREB (43 kDa)

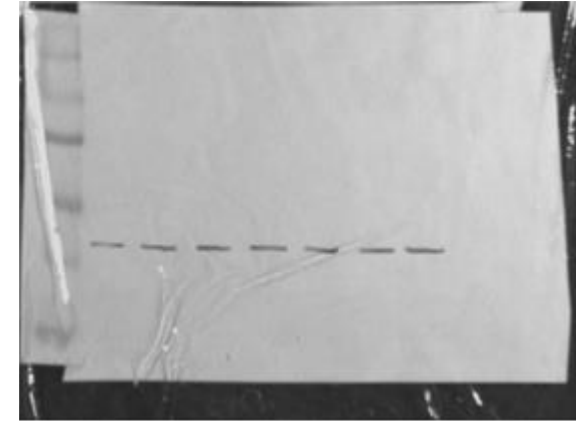

Phospho-CREB (43 kDa)

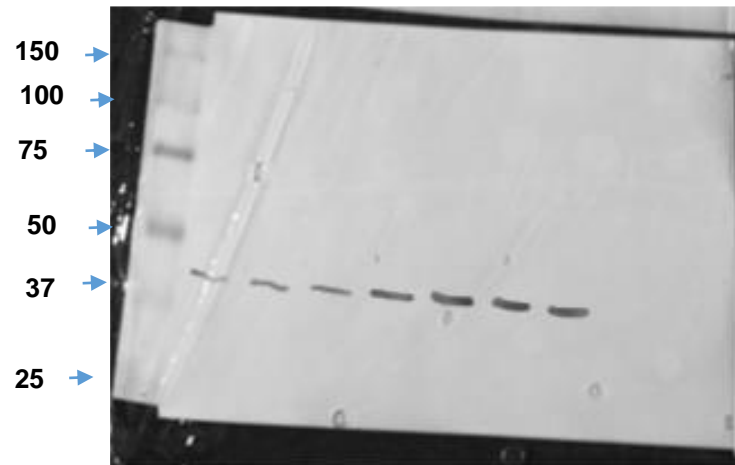

CREB (43 kDa)

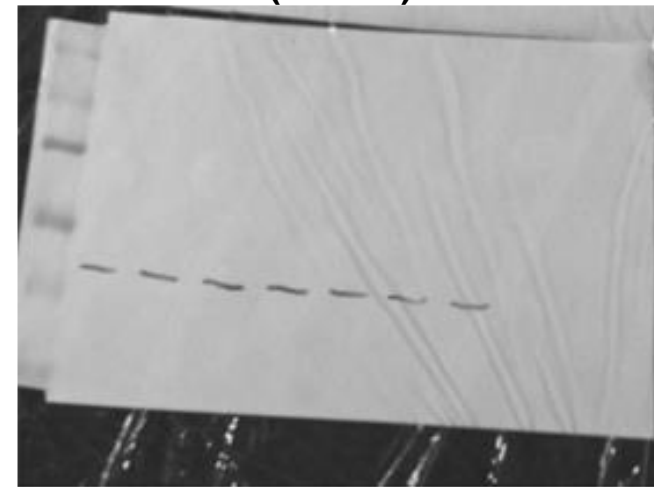

**Revelation of the blots performed with the** a G-box SynGene (Ozyme, St Quentin en Yvelines, France) and GeneSnap software : a composite with the membrane with the markers and the membrane revealed with ECL after the antibodies incubation is shown. Membranes were probed with phospho-Creb antibodies and then after stripping they were probed with total Creb antibodies.

**Supplemental figure 14**

# Phospho-AKT (56 kDa) in KGN cells

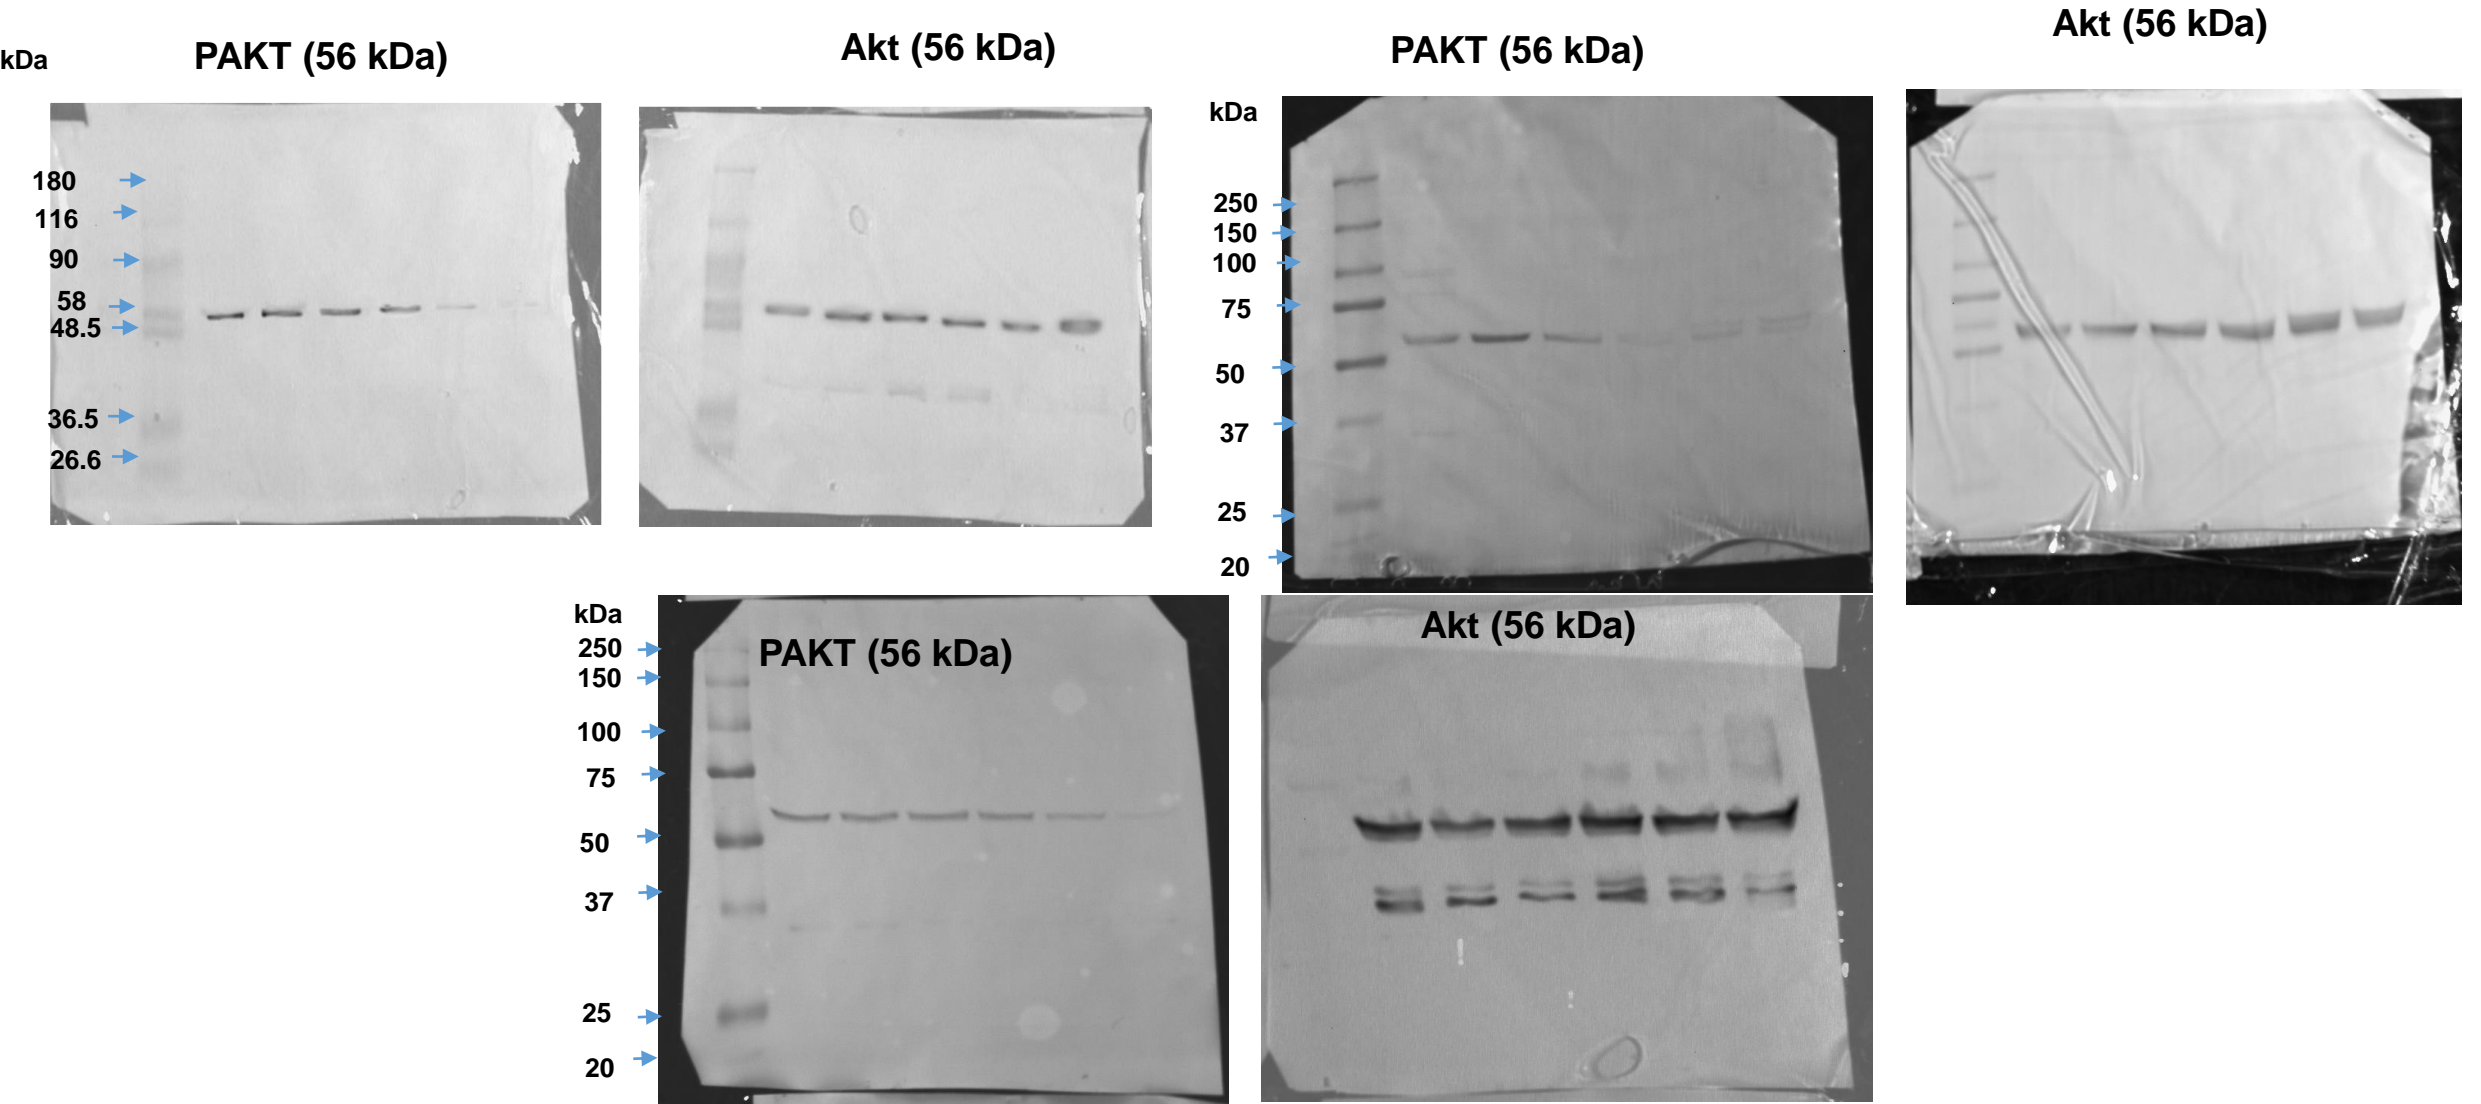

**Revelation of the blots performed with the** a G-box SynGene (Ozyme, St Quentin en Yvelines, France) and GeneSnap software : a composite with the membrane with the markers and the membrane revealed with ECL after the antibodies incubation is shown. Membranes were probed with phospho-Akt antibodies and then after stripping they were probed with with total Akt antibodies.

**Supplemental figure 15**

# Phospho-AKT (56 kDa) in hGC cells

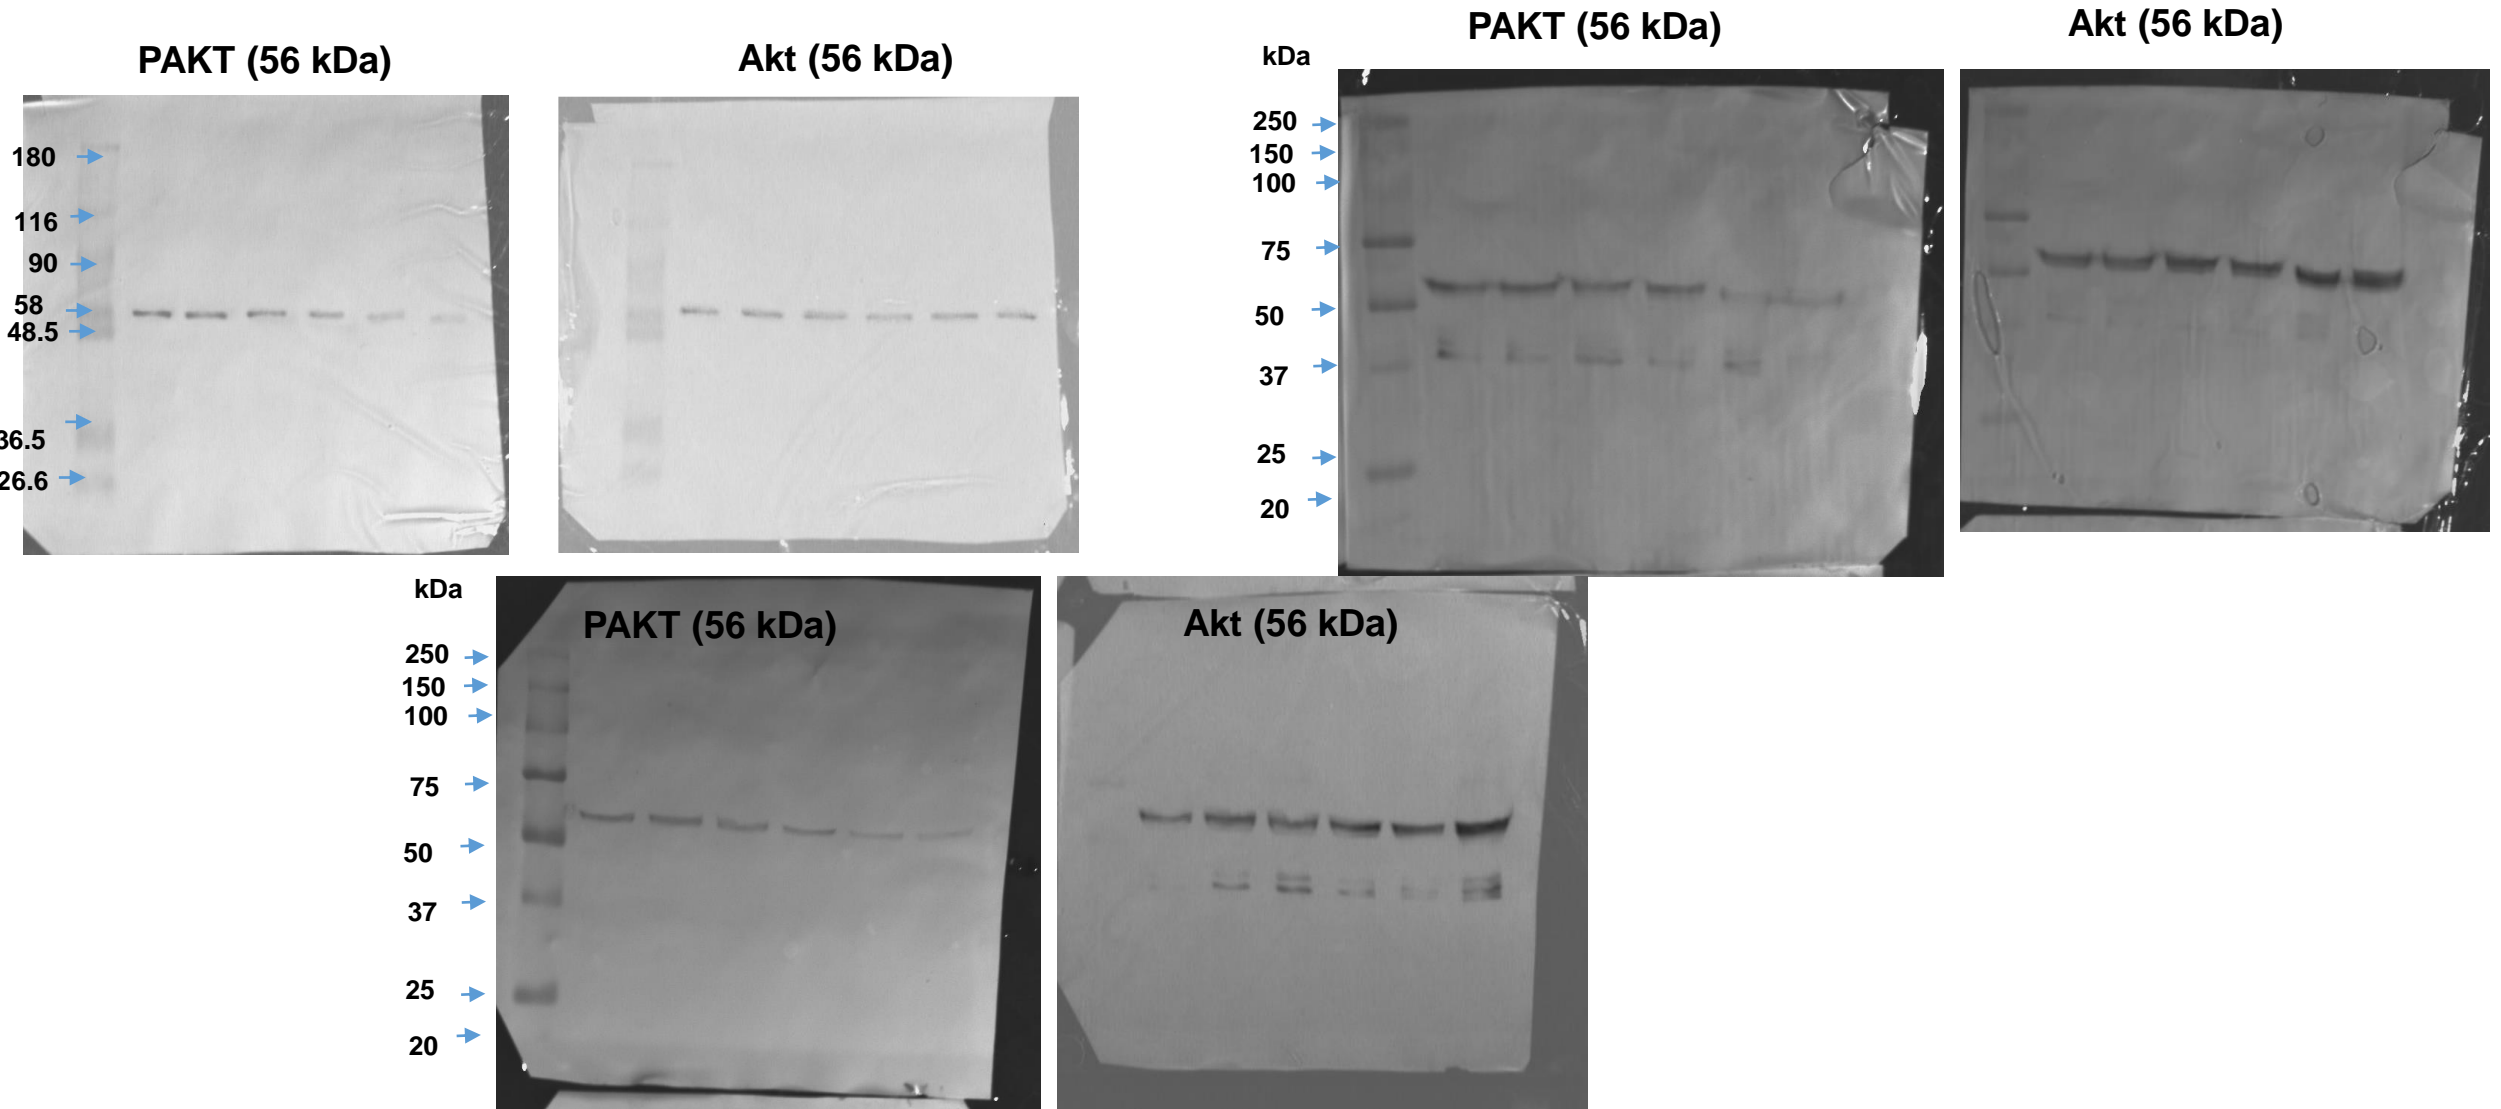

**Revelation of the blots performed with the** a G-box SynGene (Ozyme, St Quentin en Yvelines, France) and GeneSnap software : a composite with the membrane with the markers and the membrane revealed with ECL after the antibodies incubation is shown. Membranes were probed with phospho-Akt antibodies and then after stripping they were probed with total Akt antibodies.

**Supplemental figure 16**

# pERK1/2 (42/44 kDa) in KGN cells

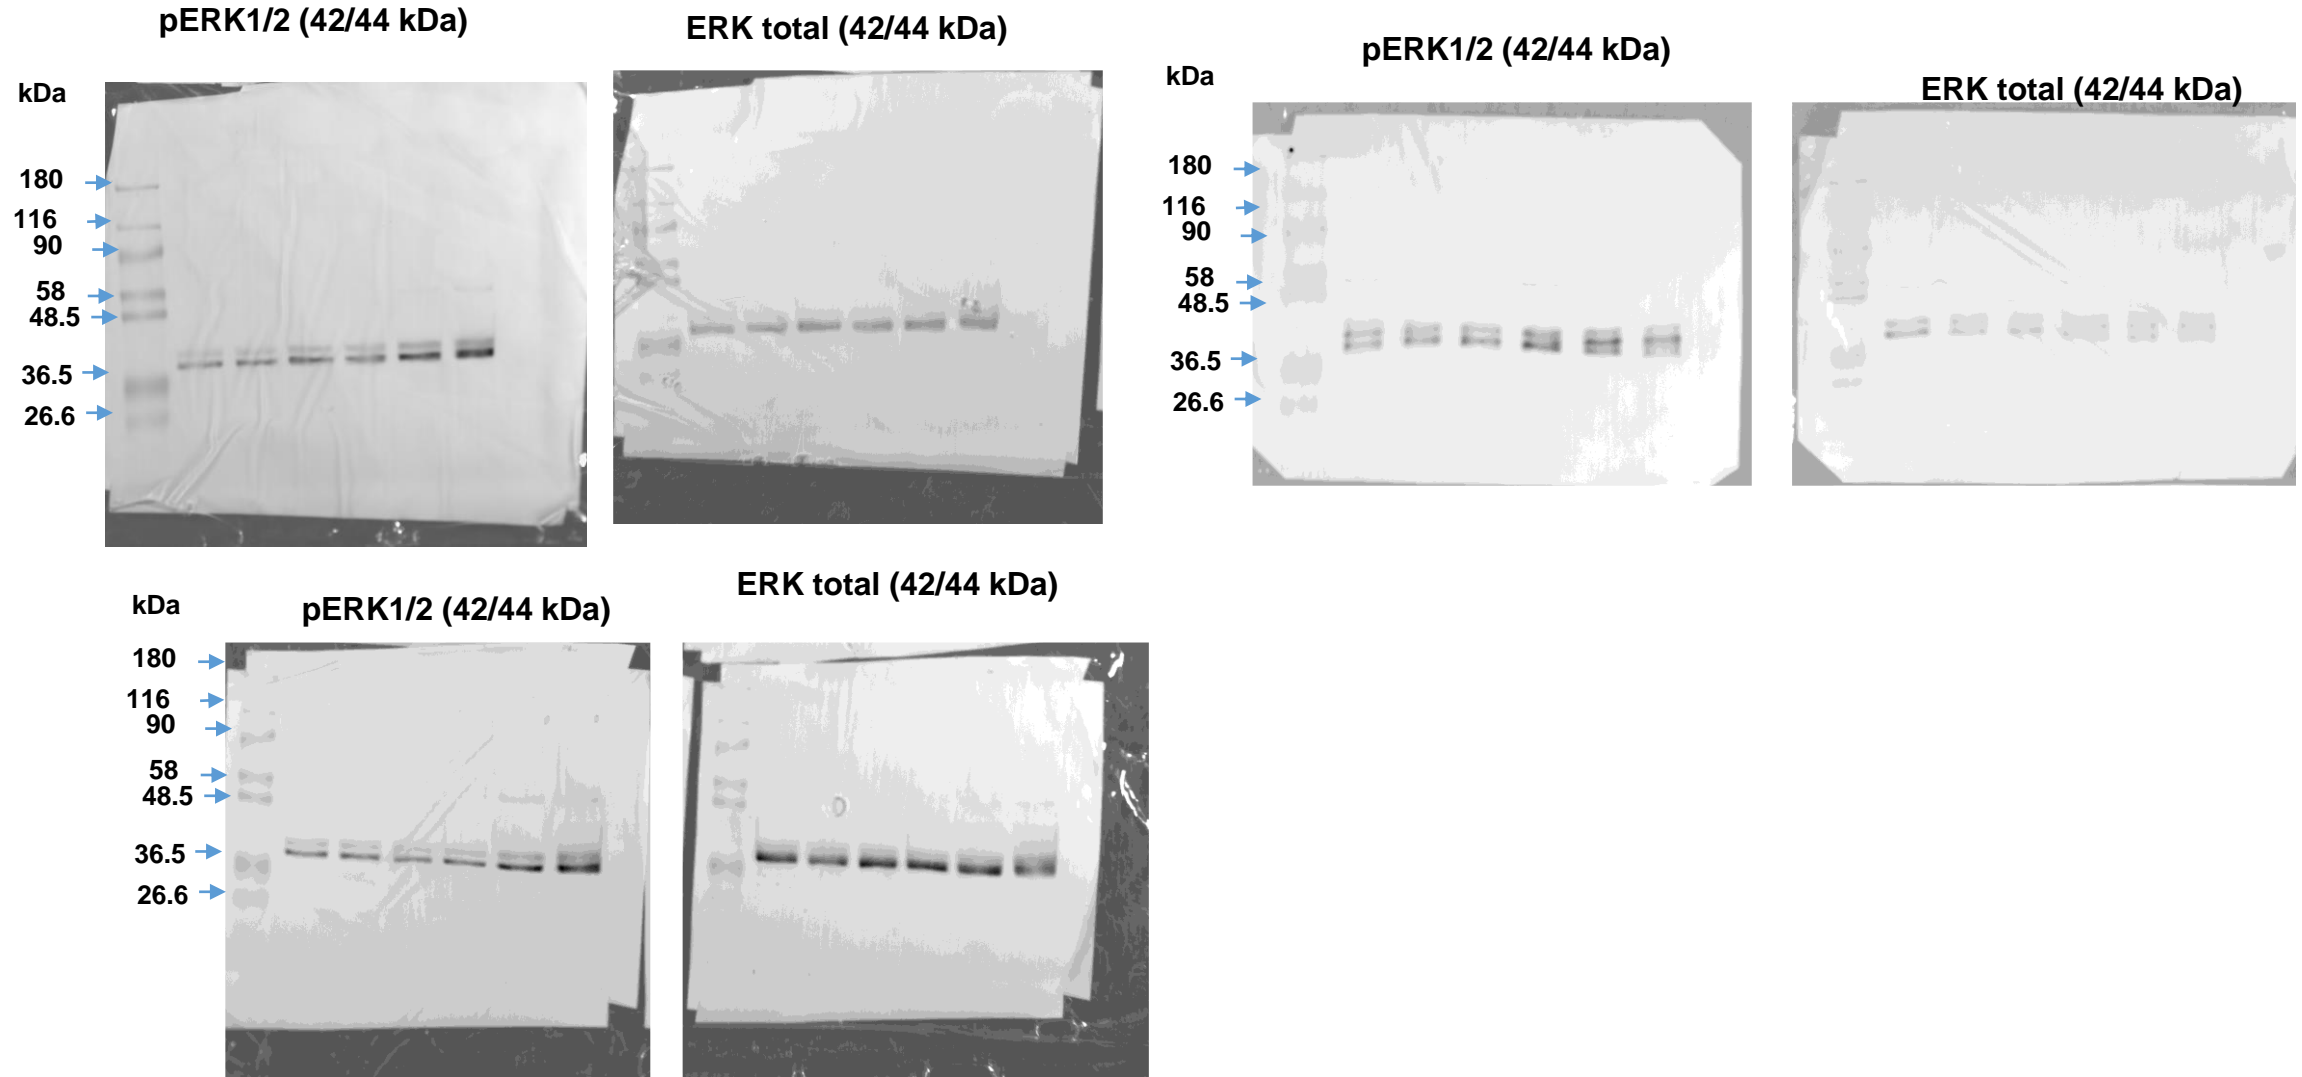

**Revelation of the blots performed with the** a G-box SynGene (Ozyme, St Quentin en Yvelines, France) and GeneSnap software : a composite with the membrane with the markers and the membrane revealed with ECL after the antibodies incubation is shown. Membranes were probed with phospho-ERK1/2 antibodies and then after stripping they were probed with with total ERK1/2 antibodies.

**Supplemental figure 17**

# pERK1/2 (42/44 kDa) in hGC cells

pERK1/2 (42/44 kDa)

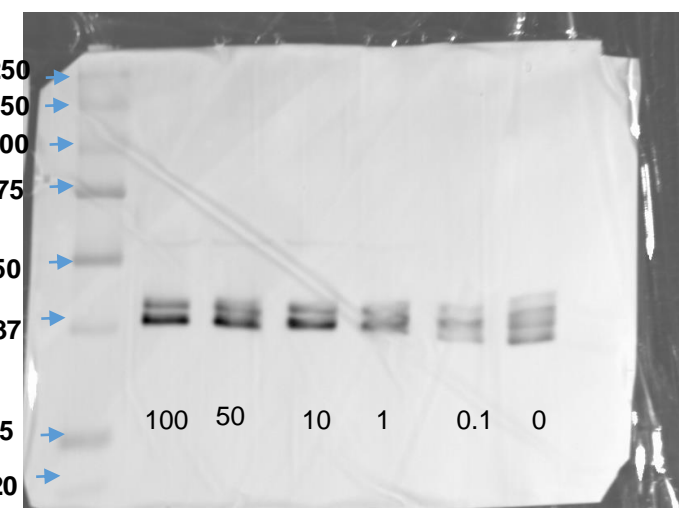

ERK total (42/44 kDa)

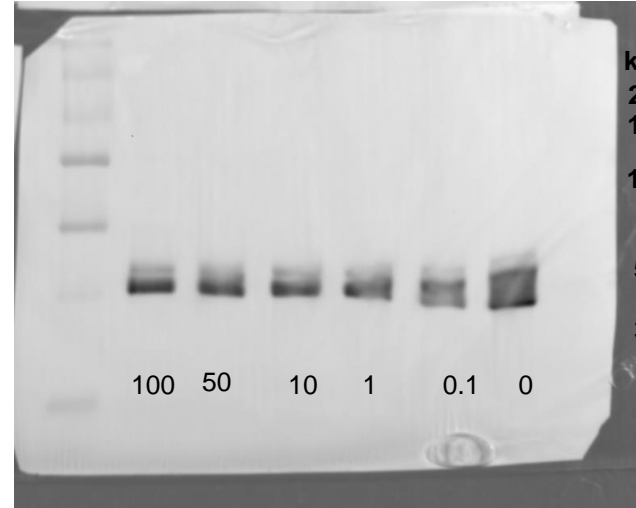

pERK1/2 (42/44 kDa)

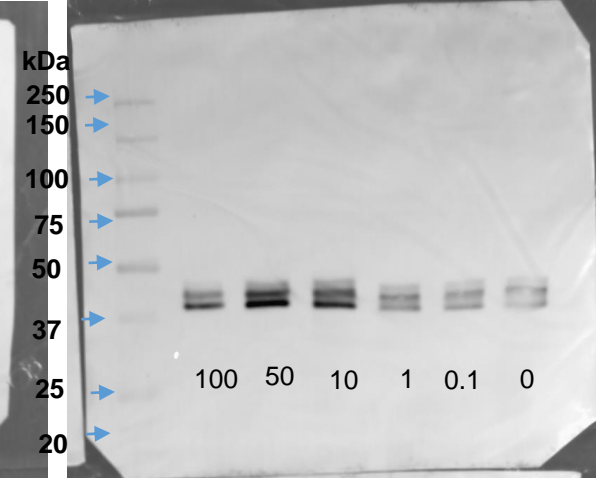

ERK total (42/44 kDa)

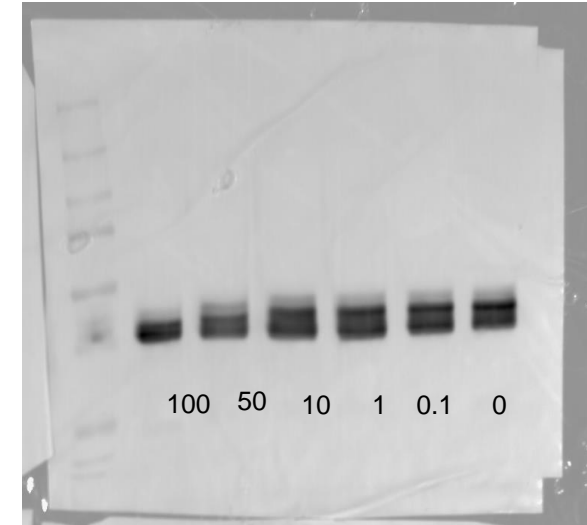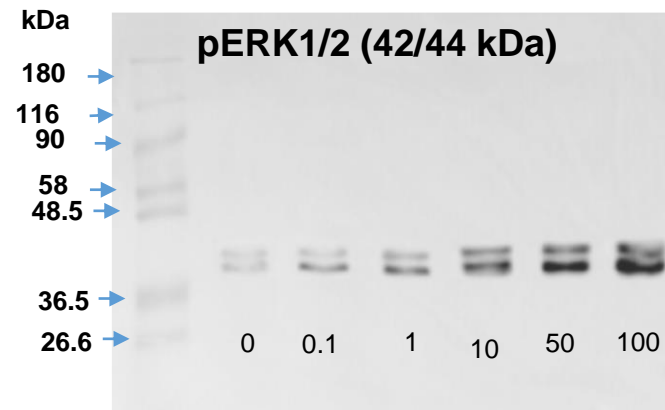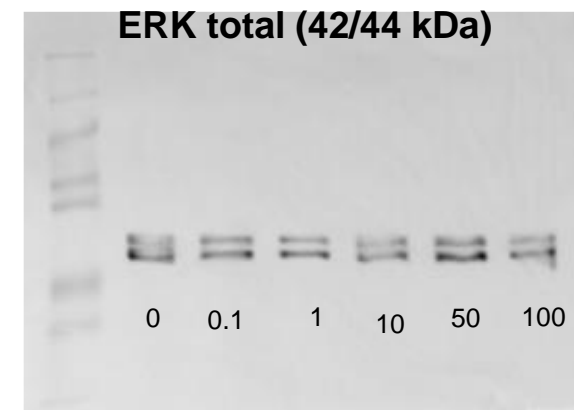

**Revelation of the blots performed with the** a G-box SynGene (Ozyme, St Quentin en Yvelines, France) and GeneSnap software : a composite with the membrane with the markers and the membrane revealed with ECL after the antibodies incubation is shown. Membranes were probed with phospho-ERK1/2 antibodies and then after stripping they were probed with total ERK1/2 antibodies.

**Supplemental figure 18**
